# Supplementary material for: Looking into the flora of Dutch Brazil: botanical identifications of seventeenth century plant illustrations in the Libri Picturati
Source: Research Square preprint supplement (doi:10.21203/rs.3.rs-609648/v1), 2021-06-14
Supplement: Supplementary file 1 [file 35a217fcf758b19c4da05064.xlsx]

## Sheet: Theatrum Naturalium Brasiliae
Dataset 1. Taxonomical identifications of the plant illustrations and empty folios in the Theatrum Naturalium Brasiliae with references to Marcgrave and Piso (1648, 1658). Information on growth form, geographical origin, conservation and domestication status and plant parts represented is provided for those plant species depicted in the illustrated folios. Overlaps in species composition with Mar…
Folio numbers Theatrum	Vernacular names and references to Marcgrave and Piso (1648, 1658)	ID Species	Family	Life form	Native / Introduced	Exotic origin	Domestication status	Conservation status (Endemism)	Plant parts represented	Taxa present in HNB / IURNM	Taxa present in Herbarium	Taxa present in MC	Taxa present in LP
1	Nana Brasiliensis, Ananas Lusitanis. Piso HUI p.195. It Margr. HB p.33	Ananas comosus (L.) Merr.	Bromeliaceae	Herb	Native		Domesticated	Not Evaluated	Stem, leaves and fruit (plus detail of fruit open)	x	x		x
3	Nanà Caapóra. Nana brava forsan Piso in HUI pag. 196	Aechmea muricata (Arruda) L.B.Sm.	Bromeliaceae	Herb	Native		Wild	Endangered (Endemic to northeast Brazil)	Stem, leaves and fruit (plus detail of fruit open)
5
7	Caraguata-acanga seu (1?) species Piso HUI pag: 192. it Marg: HB: pag 86	Bromelia karatas L.	Bromeliaceae
9	Caraguata-guaçu seu 2da species Piso HUI pag. 192. it: Marg: HB: pag. 86	Furcraea hexapetala (Jacq.) Urb.	Asparagaceae
11	Caraguata-nema seu 3á spés. Erva babosa seu Aloë. Piso HUI. pag 193. it Marg: HB pag 37	Aloe vera (L.) Burm.f.	Xanthorrhoeaceae	Herb	Introduced	Middle East, South Africa	Domesticated	Not Evaluated / Cites	Stem, leaves and inflorescence (plus detail of leaf)	x
13	Caragúata 4ta spés. Piso pag 193. it: Marg: pag. 86	Aechmea tomentosa Mez	Bromeliaceae	Herb	Native		Wild	Not Evaluated (Endemic to Brazil)	Stem, leaves and inflorescence	x
15	Marimbu	Cordyline sellowiana Kunth	Asparagaceae	Shrub	Native		Wild	Not Evaluated	Stem, leaves and inflorescence
17	Caraguata seu 5ta sylvestris Piso HUI pag: 193	Encholirium spectabile Mart. ex Schult. & Schult.f.	Bromeliaceae
19	Acaju. Acajaiba cum fructu Acaju. Pis HUI pag. 120. it. Marg: pag 94	Anacardium occidentale L.	Anacardiaceae	Tree	Native		Domesticated	Not Evaluated	Branch with leaves, flowers and fruits	x	x
21	Jabuticaiba Pis HUI pag 121. it. Marg. Pag. 141	Plinia cauliflora (Mart.) Kausel	Myrtaceae
23	Iamacaru 1a Pis. HUI pag. 188. it Marg. Pag. 23. 125	Cereus fernambucensis Lem.	Cactaceae	Shrub	Native		Wild	Not Evaluated / Cites (Endemic to Brazil)	Branch with fruit (plus detail of fruit open)	x
25	Iamacaru 2da Pis HUI pag. 189	Selenicereus undatus (Haw.) D.R.Hunt	Cactaceae
27	Iamacaru 3a alïs Coxuba (Caruba?) Pis. HUI pag. 189. it. Marg: pag: 126	Cereus jamacaru DC.	Cactaceae
29	Iamacaru 4ta alïs (abusive?) Iaracatia. Pis. HB pag: 100 and in HUI pag: 190. it Marg pag: 126	Brasiliopuntia brasiliensis (Willd.) A.Berger	Cactaceae	Shrub	Native		Wild	Least Concern: Decreasing / Cites	Plant with branches and leaves	x
31	Iamacaru 5ta alÿs Cumbeba. Pis HUI pag: 190	Cereus fernambucensis Lem.	Cactaceae
33	Iamacaru 6ta alias Urumbeba. Pis HUI pag: 191	Opuntia ficus-indica (L.) Mill.	Cactaceae
35	Iaçapucaio Pis Pag. 134 in HUI. It Marg pag. 128	Lecythis pisonis Cambess.	Lecythidaceae	Tree	Native		Wild / Cultivated	Not Evaluated (Endemic to Brazil)	Branch with leaves and fruit
37	Iaçapucaio com alÿs fructibus	Costus spiralis L.	Costaceae	Shrub	Native		Wild	Not Evaluated	Branch with leaves and inflorescence
37	Iaçapucaio com alÿs fructibus	Lecythis pisonis Cambess	Lecythidaceae	Tree	Native		Wild / Cultivated	Not Evaluated (Endemic to Brazil)	Fruit open and seeds	x
37	Iaçapucaio com alÿs fructibus	Macoubea guianensis Aubl.	Apocynaceae	Tree	Native		Wild / Cultivated	Least Concern	Fruit open and seeds	x
39	Iaçapucaio Alia species Pis: HUI pag. 134	Lecythis sp.	Lecythidaceae
41	Pinoguaçu mas Pis HUI pag. 159	Carica papaya L.	Caricaceae
41	Pinoguaçu fam: ibid:	Carica papaya L.	Caricaceae
43	Iaracatia it Pis: HUI pag. 160. it Marg: HB pag 128	Jacaratia spinosa (Aubl.) A.DC.	Caricaceae	Tree	Native		Wild	Least Concern	Upper part of the tree with leaves and fruit (plus detail of fruit open)	x
45	Pindova Lusitanis. Inaja Brasil. Pis in HUI: pag. 125. Pindoba in Marg HB: pag: 133	Attalea compta Mart.	Arecaceae
47	Carnaiba i Pis HUI pag. 126. it Marg HB pag. 130 id. Ananacbicariri (?) Marg. Pag. 133	Copernicia prunifera (Mill.) H.E.Moore	Arecaceae
49	Carnaiba 2da Pis in HUI pag. 126	Mauritia flexuosa L.f.	Arecaceae
51	Urucuria cit fructus Urucury. Pis HUI pag. 127. Çocara Pis pag. 128. it Iocara et Iucorara Marg pag. 133	Syagrus coronata (Mart.) Becc.	Arecaceae	Tree	Native		Wild	Least Concern (Endemic to Brazil)	Branch with fruits	x
53	Urucuruiba. Marg pag. 104. 109	Syagrus coronata (Mart.) Becc.	Arecaceae
55	Tucum Pis HUI pag. 128	Astrocaryum vulgare Mart.	Arecaceae
57	Airi Pis: p. 129	Astrocaryum aculeatissimum (Schott) Burret	Arecaceae
59	Aque seu Catole. Pis: p. 129	Syagrus comosa (Mart.) Becc.	Arecaceae
61	Iraiba. Pis: p.129	Syagrus oleracea (Mart.) Becc.	Arecaceae
63	Miriti. Pis. pag. 129	Mauritia flexuosa L.f.	Arecaceae
65	Marajaiba. Pis. pag. 129	Bactris maraja Mart.	Arecaceae
67	Inajaguaçu. Inajaguaçuiba vulgó Cocos. Pis p. 130. Cocoeiro Indica. Marg. p. 138	Cocos nucifera L.	Arecaceae	Tree	Introduced	Tropical Asia-Pacific	Cultivated	Not Evaluated	Upper part of the plant with leaves and fruits	x	x	x	x
69	Ietaibae fructus. Pis p. 123. Marg p. 101	Hymenaea courbaril L.	Fabaceae	Tree	Native		Wild / Cultivated	Least Concern	Fruit open	x
71	Içicariba. Pis. pag. 122. Marg: 98	Protium heptaphyllum (Aubl.) Marchand	Burseraceae
73	Caaopia. Pis. p. 124	Vismia guianensis (Aubl.) Pers.	Hypericaceae
75	Cabureiba seu Balsamum Peruvianum. Pis. p. 119. Cabui Iba. Marg. p. 137	Myroxylon balsamum (L.) Harms	Fabaceae
77	Copaiba P.p: 118. Coapoiba. Marg: p. 130	Copaifera officinalis L.	Fabaceae
79	Copiiba. Marg. p. 121	Tapirira guianensis Aubl	Anacardiaceae
81	Curupicaiba. Marg. p. 132	Protium heptaphyllum (Aubl.) Marchand	Burseraceae
83	Maratatabiba. Marg. 132	Schefflera morototoni (Aubl.) Maguire, Steyerm. & Frodin	Araliaceae
85	Mandihoca Pis: p. 114-305. Mandiiba. Maniiba. Marg: p. 65	Manihot esculenta Crantz.	Euphorbiaceae
87	Mandihoca sglr (?): seu Cuguaçucarenia. Cuaçumandiiba Pis: p. 117. vide pag 331 (?)	Manihot carthaginensis subsp. glaziovii (Müll.Arg.) Allem	Euphorbiaceae
89	Tacomarée seu Arundo Sacharifera. Pis p. 108. Uuba. Marg. p. 32	Saccharum officinarum L.	Poaceae
91
93	Aroeira seu Lentiscus. Pis p. 132. Marg. P. 90	Schinus terebinthifolia Raddi	Anacardiaceae
95	Urucu. Pis p. 133. M. p. 61	Bixa orellana L.	Bixaceae	Tree	Native		Domesticated	Least Concern	Branch with leaves, fruits (plus detail of fruits open and seeds)	x
97	Urucu alia spés. Pis. p. 133. M. p. 61	Bixa orellana L.	Bixaceae
99	Guiticoroya. Guitiiba I. ciug (?) fructus Guiticoroya. Pis p. 136. Marg p. 114. 115	Couepia rufa Ducke	Chrysobalanaceae	Tree	Native		Wild	Not Evaluated (Endemic to Brazil)	Branch with leaves and fruit (plus detail of fruit open)	x
101	Guitiguaçu	Couepia rufa Ducke	Chrysobalanaceae	Tree	Native		Wild	Not Evaluated (Endemic to Brazil)	Branch with leaves and fruit
103	Guitys 2da spés. Guitiroba. Pis p. 136. Marg p. 113	Pouteria grandiflora (A.DC.) Baehni	Sapotaceae
105	Guitiyba 3a cúig fructus Guiti-miri Pis p. 137. Marg. p. 114	Licania tomentosa (Benth.) Fritsch.	Chrysobalanaceae
107	Ibacurapari. Marg. p. 114	Moronobea coccinea Aubl.	Clusiaceae
107	Ibapurunga Id. p. 116	Vitex rufescens A.Juss.	Lamiaceae
109	Ianipaba. Pis. P. 138. Marg. p. 92	Genipa americana L.	Rubiaceae	Tree	Native		Wild / Cultivated	Least Concern	Branch with leaves and flowers	x
111	Acacia. Pis pag. 139. Ibametara. Marg p. 68- et 129	Spondias mombin L.	Anacardiaceae
113	Tapia. Pis. p. 140. Marg p. 98	Crateva tapia L.	Capparaceae	Tree	Native		Wild	Not Evaluated	One branch with leaves and fruits (plus details of the fruit open)	x
113	Tapia. Pis. p. 140. Marg p. 98	Crateva tapia L.	Capparaceae	Tree	Native		Wild	Not Evaluated	Branch with leaves, flowers and flower buttoms
115	Pekia seu Pequea. Pis p. 141. Marg p. 93. 149-150	Caryocar villosum (Aubl.) Pers.	Caryocaraceae	Tree	Native		Wild / Cultivated	Least Concern	Fruit open
117	Araticûponhè. Pis p. 141. Marg p. 93. 149. 150	Annona montana Macfad.	Annonaceae	Tree	Native		Wild / Cultivated	Least Concern	Branch with leaves, flowers and fruits (plus details of the fruit open)	x	x
119	Araticuape. Pis. p. 142. Marg. p. 94	Annona salzmannii A.DC.	Annonaceae
121	Araticupana. Pis. p. 142. 306. Marg. p. 94	Annona glabra L.	Annonaceae
123	Araticu domato. Pis p. 143	Duguetia gardneriana Mart.	Annonaceae
125
127	Caaroba. Pis. p. 143	Neomarica cf. northiana (Schneev.) Sprague	Iridaceae	Herb	Native		Wild	Not Evaluated (Endemic to Brazil)	Flower
129	Pindaiba. Pis p. 141. Embira. Marg. p. 71	Xylopia frutescens Aubl.	Annonaceae
131	Ibiraba. Ibira. Pis p. 145. Marg p. 99	Xylopia frutescens Aubl.	Annonaceae	Tree	Native		Wild	Least Concern	Branch with leaves and fruits	x
133	Anhuiba seu Sassafras Pis p. 146	Ocotea sassafras (Meisn.) Mez	Lauraceae
135	Ibiraéé seu Guajacum. Pis p. 146. Marg p. 101	Pradosia kuhlmannii Toledo	Sapotaceae
137	Ambaiba Pis p. 147. Marg p. 91	Cecropia pachystachya Trécul	Urticaceae	Tree	Native		Wild	Not Evaluated	Upper part of trunk with leaves, flowers and fruits	x	x
139	Ambaibuna	Unknown
141	Ambaitinga. Pis p. 145	Cecropia hololeuca Miq.	Urticaceae
143	Anda. Pis p. 148. Marg p. 110	Joannesia princeps Vell.	Euphorbiaceae
145	Nhambu guaçu seu Ricinus Americanus. Pis p. 180. Marg p. 77	Ricinus communis L.	Euphorbiaceae	Shrub	Introduced	Tropical Africa	Wild / Cultivated	Not Evaluated	Stem, branches, leaves, flowers buds / male (yelllow) flowers, female (red) flowers, inripe / ripe fruits, seed details	x	x	x
147	Nhua arbor. Marg p. 100	Talisia esculenta (Cambess.) Radlk.	Sapindaceae
149	Inimboi. Pis p. 205. Marg p. 56	Guilandina bonduc L.	Fabaceae	Shrub	Introduced	Tropical Africa	Wild (Naturalized)	Least Concern	Branch with leaves, flowers, fruit branch with fruit open with seeds / fruit closed	x	x	x
151	Biribà	Duguetia marcgraviana Mart.	Annonaceae	Tree	Native		Wild	Least Concern	Branch with leaves, fruit ripe / unripe, seeds
153	Romeiro seu Granatus	Punica granatum L.	Lythraceae	Tree	Introduced	Middle East	Domesticated	Least Concern	Branch with leaves, flower buds, flowers, fruit and detail of open fruit
155		Citrus x limon (L.) Osbeck	Rutaceae	Tree	Introduced	Tropical Asia	Domesticated	Not Evaluated	Fruit, fruit open, small branch with leaves and spines
157	Quapoiba (Copiriba Marg. 121, written by pencil)	Ficus gomelleira Kunth & C.D.Bouché	Moraceae	Tree	Native		Wild	Not Evaluated	Leaf (detail of venation)	x
159	Ioaimbô. Aranty pavi spés?	Solanum sp.	Solanaceae	Shrub	Native		Wild	Unknown	Branch with leaves, fruits, flower buds
161	Puî (aff. Mureci Piso 171, written by pencil)	Miconia lepidota DC.	Melastomataceae	Tree	Native		Wild	Not Evaluated	Branch with leaves and infrutescence
163	Iapoarandiba. Iaparandiba. Pis p. 172. Marg p. 109	Gustavia augusta L.	Lecythidaceae	Tree	Native		Wild	Not Evaluated	Branch with leaves, flower and fruits	x		x
165	Iandiparana	Gustavia augusta L.	Lecythidaceae	Tree	Native		Wild	Unknown	Branch with flower, flower bud, fruit and fruit open with seeds
167	Mangués spés 1a Çereiba. Pis p. 204 (209?). Marg p. 127	Avicennia schaueriana Stapf & Leechm. ex Moldenke	Acanthaceae
169	Mangues spés 2da Çereibuna. Pis p. 204 (209?)	Laguncularia racemosa (L.) C.F.Gaertn.	Combretaceae
171	Guaparaiba. Mangués spés 3a Guaperoiba. Pis p. 204. Marg p. 118	Laguncularia racemosa (L.) C.F.Gaertn.	Combretaceae	Tree	Native		Wild	Least Concern: Decreasing	Branch with leaves and fruits	x
173	Meeru Cutij Pis. p. 212	Canna indica L.	Cannaceae	Herb	Native		Wild / Cultivated	Not Evaluated	Stem with leaves, flowers, fruit, fruit semi-open	x		x
175	Meeru spés . Marg p. 3. Albara. Pis p. 213	Canna glauca L.	Cannaceae
177	Pacoçeroca Pis p. 213. Marg p. 48	Renealmia alpinia (Rottb.) Maas	Zingiberaceae	Herb	Native		Wild	Not Evaluated	Stem with leaves and flowers	x
179	Ubacaya	Costus spiralis (Jacq.) Roscoe	Costaceae	Herb	Native		Wild	Not Evaluated	Stem with leaves and spike inflorescence	x
181	Pacocaatinga alys Juacacanga. Pis p. 214. Marg p. 102 (p. 48, written by pencil)	Costus arabicus L.	Costaceae	Herb	Native		Wild	Not Evaluated	Stem with leaves and spike inflorescence	x
183	Iataboca. Marg p. 3	Guadua angustifolia (H.B.) Ktk	Poaceae
185	Uuba. Marg p. 3	Gynerium sagittatum (Aubl.) P.Beauv.	Poaceae
187	Anonyma. In canna indica species?	Costus sp.	Costaceae	Herb	Native		Wild	Unknown	Stem with leaves
189	Anonyma	Souroubea cf. guianensis Aubl.	Marcgraviaceae	Liana	Native		Wild	Not Evaluated	Stem with leaves (details of the flower's petiols?)
191	Taracuaguaçu	Coccoloba brasiliensis Nees & Mart.	Polygonaceae	Liana	Native		Wild	Not Evaluated	Branch with leaves and fruits in clusters
193	Tangaraguaçuca. in Pis p: 302. Marg p: 60	Coccoloba arborescens (Vell.) R.A.Howard	Polygonaceae	Liana	Native		Wild	Not Evaluated (Endemic to Brazil)	Branch with leaves and fruits in clusters
195	Tangaraca. I Pis p. 302. Erva do Rato. Marg p. 60	Palicourea crocea (Sw.) D.C	Rubiaceae
197	Tangaraca. 2 Piso p. 302. Marg p. 60	Palicourea bracteocardia (DC.) Delprete & J.H.Kirkbr.	Rubiaceae	Shrub	Native		Wild	Not Evaluated	Branch with leaves and flowers	x
197	Tangaraca. 3 Pis: et Marg: ibid	Palicourea crocea (Sw.) Schult.	Rubiaceae	Shrub	Native		Wild	Not Evaluated	Branch with leaves, flowers and one fruit	x
199	Pinha. Munduiguaçucum pineis. Pis p. 179. Mundubiguaçu. Marg. p. 96	Jatropha curcas L.	Euphorbiaceae	Shrub	Native		Wild / Cultivated	Least Concern	Stem with leaves, flowers, fruits, fruit open with seeds and seed cut showing half	x	x
201	Ibiriba. Ibiraba. Pis p. 161. Marg p. 136	Eschweilera ovata (Cambess.) Mart. ex Miers	Lecythidaceae	Tree	Native		Wild	Least Concern	Branch with leaves, fruit, fruit open with seeds, seed cut in half	x	x
203	Mangaba. Mangaiba. Pis p. 156 (crossed by pencil). Mangabiba. Marg p. 121	Hancornia speciosa Gomes	Apocynaceae	Tree	Native		Wild / Cultivated	Not Evaluated	Branch with leaves, flowers and fruits	x		x	x
205	Cujete. Marg p. 123	Crescentia cujete L.	Bignoniaceae
207	Apeiba. Marg p. 123	Apeiba tibourbou Aubl.	Malvaceae
209	Cajarana	Homalolepis ferruginea (A.St.-Hil.) Devecchi & Pirani	Simaroubaceae	Tree	Native		Wild	Not Evaluated (Endemic to Brazil)	Branch with leaves, fruits, fruit open and seed
211	Iiaimbo (crossed with pencil and wrotte instead: Jyaimbô cf. in 159…(?)	Solanum paniculatum L.	Solanaceae	Shrub	Native		Wild	Least Concern	Branch with leaves, fruits, fruit open with seeds	x
213	Çereitinga	Avicennia schaueriana Stapf & Leechm. ex Moldenke	Acanthaceae	Tree	Native		Wild	Least Concern: Decreasing	Branch with leaves and fruits	x		x
215	Aracamiri est fructus Ibabiraba seu Guabiraba. Pis p. 150. Marg. p. 117 (written in pencil: Marg 62, Piso 151)	Psidium guineense Sw.	Myrtaceae	Tree	Native		Wild / Cultivated	Least Concern	Branch with leaves, flowers, fruits, fruit open with seeds	x		x
217	Araçámiri	Campomanesia dichotoma (O.Berg) Mattos	Myrtaceae	Tree	Native		Wild	Least Concern (Endemic to Brazil)	Branch with leaves, fruits (unripe / ripe), fruit open with seeds	x	x
219	Araçaguaçu. Pis p. 152. Marg p. 105	Psidium cattleianum Afzel. ex Sabine	Myrtaceae
221	Araçaiba Marg p. 62. 105. [74 Pis 16]	Psidium guineense Sw.	Myrtaceae
223	Anonyma	Garcinia brasiliensis Mart.	Clusiaceae	Tree	Native		Wild / Cultivated	Least Concern (Endemic to Brazil)	Branch with leaves, fruits, fruit open with seeds
225	Iito. i. (1?) Pis p. 169 (written in pencil 170). Marg 120	Trichilia hirta L.	Meliaceae
227	Ambaibuna. IIto 2 Pis p. 170. Marg p. 120	Guarea guidonia (L.) Sleumer	Meliaceae	Tree	Native		Wild	Least Concern	Branch with leaves, fruits, fruit open with seeds	x	x
229	Anonyma	Garcinia cf. gardneriana (Planch. & Triana) Zappi	Clusiaceae	Tree	Native		Wild	Least Concern	Branch with leaves, fruits, fruit open
231	Anonyma	Copaifera martii Hayne	Fabaceae	Tree	Native		Wild	Least Concern	Branch with leaves and fruits
233	Manaca. Pis p. 184. M 37 (crossed by pencil?). 69	Brunfelsia uniflora (Pohl) D.Don	Solanaceae	Shrub	Native		Wild	Least Concern	Branch with leaves, flowers and fruits	x
233	Manaca icon alia	Brunfelsia uniflora (Pohl) D.Don	Solanaceae	Shrub	Native		Wild	Least Concern	Branch with leaves and fruits (unripe / ripe)
235	Anonyma	Unknown	Unknown	Unknown	Unknown		Unknown	Unknown	Stem with leaves and a gull?
237	Iubopeba. Macumba. Melongela. Belingela. Pis p. 209. Marf p. 24	Solanum aethiopicum L.	Solanaceae	Herb	Introduced	Tropical Africa	Domesticated	Not Evaluated	Fruit, fruit open with seeds	x
239	Aninga palustris. 1. Pis p. 220	Montrichardia linifera (Arruda) Schott	Araceae
241	Aninga. 2. Pis p. 220. Aningaiba. Marg p. 106	Dieffenbachia seguine (Jacq.) Schott	Araceae	Herb	Native		Wild	Not Evaluated	Stem with leaves, fruit and fruit open	x
243	Aninga peri. Pis p. 218	Clidemia octona (Bonpl.) L.O. Williams	Melastomataceae
245	Arariba. Marg p. 106	Simira rubra (Mart.) Steyerm	Rubiaceae
247	Mucuitaiba & Mocitaiba. Marg p. 106	Zollernia ilicifolia (Brongn.) Vogel	Fabaceae
249	Abaremotemo. Avaramotemo. Pis p. 168	Abarema cochliocarpos (Gomes) Barneby & J.W.Grimes	Fabaceae	Tree	Native		Wild	Least Concern (Endemic to Brazil)	Branch with leaves and fruits	x
251	Anonyma ari aquatici spés. an Tajaoba 3. Marg p. 35 (crossed by pencil)	Zantedeschia aethiopica (L.) Spreng.	Araceae	Herb	Introduced	South Africa	Cultivated	Least Concern	Stem with leaves, spadix (flowers) and spathe
253	Anonyma ari species	Pontederia paniculata Spreng.	Pontederiaceae	Herb	Native		Wild	Not Evaluated	Stem with a leaf and flowers	x	x
255	Abatî	Zea mays L.	Poaceae	Herb	Introduced	Central America	Domesticated	Least Concern	Cob with seeds (ripe fruit) on leaf stalk
257	Ambaibuna	Vitis vinifera L.	Vitaceae	Vine	Introduced	South Europe, Middle East	Domesticated	Least Concern	Stem with leaves, tendrils, fruits (in cluster) and open fruit
259	Caoia	Vitis vinifera L.	Vitaceae	Vine	Introduced	South Europe, Middle East	Domesticated	Least Concern	Fruits (cluster)
261	Umbi. Iva umbi. Marg p. 108	Spondias tuberosa Arruda	Anacardiaceae	Tree	Native		Wild / Cultivated	Least Concern (Endemic to Brazil)	Branch with leaves, flowers, fruits (unripe/ripe), bulb rhizome and bulb cut in half	x
263	Ietica. Vulgo Batata. Pis p. 254. Marg p. 16	Ipomoea batatas (L.) Lam.	Convolvulaceae	Liana	Introduced	Central America, Peru	Domesticated	Data Deficient	Rhizome bulb and bulb cut in half	x	x		x
263	Ietica. Vulgo Batata. Pis p. 254. Marg p. 16	Ipomoea batatas (L.) Lam.	Convolvulaceae	Liana	Native		Domesticated	Data Deficient	Rhizome bulb and bulb cut in half
265	Omenapoyeime. Pis p. 254. Marg p. 51	Ipomoea batatas (L.) Lam.	Convolvulaceae
267	Pararo. Pis p. 255	Ipomoea batatas (L.) Lam.	Convolvulaceae
269	Ietiope. Pis p. 255	Pachyrhizus erosus (L.) Urb.	Fabaceae
271	Ietucu seu Mechoacanna & Xalappa. Pis p. 253	Operculina hamiltonii (G. Don) D.F. Austin & Staples	Convolvulaceae
273	Ieticucu. Marg p. 41	Operculina hamiltonii (G. Don) D.F. Austin & Staples	Convolvulaceae
275	Guajeru. Guaëru. Marg p. 77	Chrysobalanus icaco L.	Chrysobalanaceae	Tree	Native		Wild / Cultivated	Least Concern	Branch with leaves, fruits, open fruit with seed	x	x
277	Ibapitanga spés Ibipitanga. Pis p. 187. Marg p. 116 (crossed by pencil)	Eugenia brasiliensis Lam.	Myrtaceae	Tree	Native		Wild	Least Concern (Endemic to Brazil)	Branch with leaves, fruits, open fruits with seeds, seeds			x
277	Ibapitanga	Eugenia punicifolia (Kunth) DC.	Myrtaceae	Shrub	Native		Wild	Least Concern (Endemic to Brazil)	Branch with leaves and fruits (unripe to ripe), seed
279	Ibapurunga. Marg p. 116	Vitex rufescens A.Juss.	Lamiaceae	Tree	Native		Wild	Least Concern (Endemic to Brazil)	Branch with leaves, fruits, and seed?	x
279	Anonyma	Vitex cf. megapotamica (Spreng.) Moldenke	Lamiaceae	Tree	Native		Wild	Least Concern	Branch with leaves, fruits, and seeds?
281	Anonyma	Eugenia luschnathiana (O.Berg) Klotzsch ex B.D.Jacks	Myrtaceae	Tree	Native		Wild	Not Evaluated (Endemic to Brazil)	Branch with leaves and fruits	x
283	Cururuape (corrected). it. Pis p. 250. Marg p. 22	Paullinia pinnata L.	Sapindaceae	Liana	Native		Wild	Not Evaluated	Branch with leaves and fruits	x	x
285	Turari	Paullinia pinnata L.	Sapindaceae	Liana	Native		Wild	Not Evaluated	Branch with leaves and fruits
287	Caaururuguaçu	Pilocarpus jaborandi Holmes	Rutaceae	Shrub	Native		Wild	Endangered (Endemic to Brazil)	Branch with leaves, flowers and fruits
289	Inambûguaçû quiya	Erythroxylum sp.	Erythroxylaceae	Shrub	Native		Wild	Unknown	Branch with leaves and fruits			x
291	Ipecôtairà	Erythroxylum sp.	Erythroxylaceae	Shrub	Native		Wild	Unknown	Branch with leaves and fruits
293	Anonyma	Aegiphila sp.	Lamiaceae	Shrub	Native		Wild	Unknown	Branch with leaves, fruits and seeds
295	Cambui discrepat cum. Descript: et figura Pis p. 178	Schinus terebinthifolia Raddi	Anacardiaceae	Tree	Native		Wild	Not Evaluated	Branch with leaves and fruits	x
297	Tapiicuruba	Guapira cf. noxia (Netto) Lundell	Nyctagynacea	Tree	Native		Wild	Least Concern (Endemic to Brazil)	Branch with leaves and fruits
299	Pipi	Maytenus aquifolium Mart.	Celastraceae	Tree	Native		Wild	Not Evaluated	Branch with leaves and fruits
301	Aguaraquiyguaçu. Pis p. 224. Marg p. 55	Solanum americanum Mill.	Solanaceae	Herb	Native		Wild	Not Evaluated	Stem with leaves and fruits	x
303	Aguaraquiya	Rivina humilis L.	Petiveriaceae	Herb	Native		Wild	Not Evaluated	Stem with leaves, flowers and fruits		x
303	Aguaraquiya (written by pencil: Marg 55. Piso 224)	Solanum chenopodioides Lam.	Solanaceae	Shrub	Native		Wild	Not Evaluated	Branch with leaves, flowers, fruits, fruit open with seeds
305	Aguaraponda. Marg p. 6. Quiya-apuai. Quiya-apua. Pis p. 225. Marg 70 (crossed and 39 written instead)	Capsicum baccatum L.	Solanaceae	Shrub	Native		Domesticated	Not Evaluated	Branch with leaves and fruits (unripe/ripe)	x		x
307	Quiya spés. Pis p. 226	Capsicum annuum L.	Solanaceae
309
311	Iaborandi. 1 Pis p. 215. 312. Marg p. 36	Ertela trifolia (L.) Kuntze	Rutaceae
311	Iaborandi. 2 Pis p. 215. 312. Marg p. 36	Piper sp.	Piperaceae
313	Iaborandi guaçu. Iaborandi 3. Pis p. 216	Piper anisum (Spreng.) Angely	Piperaceae	Shrub	Native		Wild	Not Evaluated (Endemic to Brazil)	Branch with leaves and inflorescence	x
315	Iaborandi-guaçu. Iaborandi 4. Pis p. 216 (crossed). Marg: 369	Piper tuberculatum Jacq.	Piperaceae	Shrub	Native		Wild	Not Evaluated	Branch with leaves and inflorescence	x
317	Iaborandi-guaçu. Written by pencil: Piso 216	Piper arboreum Aubl.	Piperaceae	Shrub	Native		Wild	Not Evaluated	Branch with leaves and inflorescence / infructescence, infrutescence open
319	Iaborandi-guaçu	Piper umbellatum L.	Piperaceae	Shrub	Native		Wild	Not Evaluated	Branch with leaves and inflorescence	x
321	Piperis Aetiopia spés	Xylopia aethiopica (Dunal) A.Rich.	Annonaceae	Tree	Introduced	Tropical Africa	Cultivated	Least Concern	Branch with leaves and fruits
323	Anonyma. Arabapaca. Marg p. 35	Spigelia anthelmia L.	Loganiaceae	Herb	Native		Wild	Not Evaluated	Stem with leaves and fruits	x	x
325	Iuati. Written by pencil: Joâti	Solanum aculeatissimum Jacq.	Solanaceae	Shrub	Native		Wild	Not Evaluated	Branch with leaves and fruits
327	Anonyma	Brunfelsia cf. burchellii Plowman	Solanaceae	Shrub	Native		Wild	Not Evaluated (Endemic to Brazil)	Branch with leaves and fruits (unripe/ripe)
329	Camapu	Physalis pubescens L.	Solanaceae	Herb	Native		Wild	Least Concern	Stem with leaves and fruits (with detail of calyx)	x	x		x
331	Cuguaçuremiu. Cuguacucuremia. Cuacumandijba. Pis HB. p. 55. Mandiboca sylv: Pis. HUI pag. 117	Manihot carthagenensis subsp. glaziovii (Müll.Arg.) Allem	Euphorbiaceae	Tree	Native		Wild	Not Evaluated (Endemic to Brazil)	Branch with leaves, flower buds, fruits, fruit open with seeds	x
333	Araticuguçu. Araticupana. Pis p. 306	Annona glabra L.	Annonaceae	Tree	Native		Wild	Least Concern	Branch with leaves and fruits (unripe/ripe)	x		x
335	Çaiimbeuébô	Cf. Ficus sp.	Moraceae	Tree	Native		Wild	Unknown	Branch with leaves, fruits, open fruit
337	Aguaixipurúnga	Croton cf. floribundus Spreng.	Euphorbiaceae	Tree	Native		Wild	Not Evaluated	Branch with leaves and fruits
339	Ubapitanga. Written by pencil: Marcg 116. Piso 187	Eugenia uniflora L.	Myrtaceae	Shrub	Native		Wild / Cultivated	Not Evaluated	Branch with leaves, flowers, flower buds and fruits	x	x
339		Eugenia cf. uniflora L.	Myrtaceae	Shrub	Native		Wild / Cultivated	Not Evaluated	Branch with leaves and fruit
341	Camarauna. Camaratinga. Pis p. 177. Marg p. 35 (15? 5?). Camarajuba. Pis HB p. 85	Lantana camara L.	Verbenaceae	Shrub	Native		Wild	Not Evaluated	Stem with leaves, flowers and fruits	x
341	Camarajuba	Clerodendrum sp.	Lamiaceae	Shrub	Native		Unknown	Unknown	Stem with leaves, flowers and fruits (E. uniflora: fruit and seed)
341		Eugenia cf. uniflora L.	Myrtaceae	Shrub	Native		Wild / Cultivated	Not Evaluated	Stem with leaves, flowers and fruits (E. uniflora: fruit and seed)
343	Camara-apena. Camara-japo. Pis p. 218 (117). Marg p. 25	Ageratum conyzoides (L.) L.	Asteraceae	Herb	Native		Wild	Least Concern	Stem with leaves and flowers	x
345
347	Ibixuma.Pis p. 162. Marg p. 131; sed discrepant	Guazuma ulmifolia Lam.	Malvaceae	Tree	Native		Wild	Least Concern	Branch with leaves, fruits, open fruit with seeds	x	x
349	Tataiiba. Pis p. 163. Marg p. 119. Ibacurapari. Marg 119 (crossed)	Maclura tinctoria (L.) D.Don ex Steud.	Moraceae	Tree	Native		Wild	Least Concern	Branch with leaves, fruits, open fruit with seeds	x	x
351	Anonyma	Hyptis lanceolata Poir.	Lamiaceae	Shrub	Native		Wild	Not Evaluated	Stem with leaves and fruits
353	Anonyma	Copaifera langsdorfii Desf.	Fabaceae	Tree	Native		Wild	Not Evaluated	Branch with leaves
353	Anonyma	Unknown	Unknown	Unknown	Unknown		Unknown	Unknown	Branch with leaves
355	Anonyma	Sparattanthelium cf. tupiniquinorum Mart.	Hernandiaceae	Shrub	Native		Wild	Least Concern	Stem/Branch with leaves and fruits	x	x
357	Anonyma	Unknown	Unknown	Unknown	Unknown		Unknown	Unknown	Branch with leaves
359	Ibibura. Carapucu. Pis p. 309	Copelandia cyanescens (Berk. & Broome) Singer	Bolbitiaceae	Fungi	Native		Wild	Not Evaluated	Cap, gill, stipe, mycelium	x
361
363	Erva do Capitao. Açariçoba. Pis p. 260. Marg p. 27	Hydrocotyle bonariensis Comm. ex Lam.	Araliaceae	Herb	Native		Wild	Least Concern	Stem with roots, and leaves	x
365	Iaçape. Pis p. 237. Marg p. 2	Cyperus surinamensis Rottb. (Woodcut),	Cyperaceae
365	Iaçape. Pis p. 237. Marg p. 2	Imperata contracta (Humb., Bonpl. & Kunth) Hitchc. (Description)	Poaceae
367	Paratura. Pis p. 238. s.le:	Cyperus pedunculatus (R.Br.) J.Kern	Cyperaceae	Herb	Native		Wild	Least Concern	Stem with leaves	x
369	Capuupeba. Pis p. 238. Capupeba. Marg p. 2	Andropogon bicornis L.	Poaceae
371	Iupicai. Pis p. 238	Xyris jupicai Rich.	Xyridaceae
373	Anonyma	Paspalum virgatum L.	Poaceae	Herb	Native		Wild	Not Evaluated	Stem with leaves and inflorescence	x
373	Amongeba. Pis p. 239	Setaria parviflora (Poir.) M.Kerguelen	Poaceae	Herb	Native		Wild	Critically Endangered	Stem with leaves and inflorescence	x
375
377
379
381	Çanambaya. Marg p. 78. 46 (96? crossed)	Epiphyllum phyllanthus (L.) Haw.	Cactaceae	Herb	Native		Wild	Least Concern / Cites	Stem with leaves	x
383	Anonyma	Montrichardia cf. linifera (Arruda) Schott	Araceae	Herb	Native		Wild	Not Evaluated	Fruit	x
383	Anonyma	Unknown	Unknown	Unknown	Unknown		Unknown	Unknown	Inflorescence / infrutescence?
385	Tucucuruata. Piso 126 (written by pencil)	Syagrus cf. coronata (Mart.) Becc.	Arecaceae	Tree	Native		Wild	Least Concern (Endemic to Brazil)	Inflorescence with spathe
387	Iaruparicuraba	Amphilophium crucigerum (L.) L.G.Lohmann	Bignoniaceae	Liana	Native		Wild	Not Evaluated	Fruit closed / open
389	Tupaipi. an Tupaipi & Urucatu (crossed) Pis p. 235. Marg p. 32. 35 (crossed)	Hippeastrum psittacinum (Ker Gawl.) Herb.	Amaryllidaceae	Herb	Native		Wild	Endangered (Endemic to Brazil)	Bulb, roots, leaves	x
391	Iacarandaape. vid Pis p. 164. Marg p. 136	Swartzia pickelii Killip ex Ducke	Fabaceae	Tree	Native		Wild	Least Concern (CNC-Flora) / Threatened (MMA) / Endangered (Fundação Biodiversitas, 2005) (Endemic to northeast Brazil)	Fruit closed / open with seeds, seeds	x
393	Mucuna vel Cur(n)aja. Mucunaguaçu. Pis p. 307. Marg p. 18	Mucuna urens (L.) Medik.	Fabaceae	Liana	Native		Wild	Not Evaluated	Branch with leaves, fruits, open fruit with seeds	x
395	Inga. Marg p. 111	Inga edulis Mart.	Fabaceae	Tree	Native		Wild / Cultivated	Least Concern	Branch with leaves, fruits, open fruit with seeds	x
397	Inga. Marg p. 112	Inga edulis Mart.	Fabaceae	Tree	Native		Wild / Cultivated	Least Concern	Branch with leaves and flowers
399	Nhuatiunana	Samanea saman (Jacq.) Merr.	Fabaceae	Tree	Native		Wild	Least Concern	Branch with leaves and flowers	x	x
401	Çipotinga-apè	Fridericia cf. dichotoma (Jacq.) L.G.Lohmann	Bignoniaceae	Liana	Native		Wild	Not Evaluated	Branch with leaves, fruits, open fruit with seeds
403	Aminiiu. Pis p. 186. Marg p. 59	Gossypium barbadense L.	Malvaceae	Shrub	Introduced	Andes (Peru)	Domesticated	Least Concern	Stem with leaves, and ripe fruits open with seeds	x		x
405	Moucouna. Lob Macoúna phaseli brasiliana	Dioclea marginata Benth.	Fabaceae	Liana	Native		Wild	Not Evaluated (Endemic to Brazil)	Branch with leaves, fruits, seeds	x
407	Comendaguaçu (in pencil: Piso 251). An. Comendaguira Marg p. 62 (crossed)	Phaseolus vulgaris L.	Fabaceae	Liana	Introduced	Central America, Andes	Domesticated	Least Concern	Stem with leaves, fruit, seeds	x			x
409	Fructus Mandapitiu. Iarere. Guandatara	Phaseolus spp.	Fabaceae	Liana	Unknown		Unknown		Seeds (Beans)
411	Boiamaracá	Crotalaria incana L.	Fabaceae	Shrub	Native		Wild	Not Evaluated	Branch with leaves, flowers, fruits, fruit open with seeds		x
413	Anonyma	Crotalaria sp.	Fabaceae	Shrub	Native		Wild	Not Evaluated	Branch with leaves, flowers, fruits, fruit open with seeds
415	Curupaimiri	Bowdichia virgilioides Kunth	Fabaceae	Tree	Native		Wild	Near Threatened	Branch with leaves, flower buds and fruits	x
417	Çapotaya	Cynophalla hastata (Jacq.) J.Presl	Capparaceae	Shrub	Native		Wild	Least Concern	Branch with leaves, flower buds, fruits, open fruit with seeds, seeds
419	Tapoçuca. Spec. Siliqua Africana. Clus exot. 142 15	Abrus precatorius L.	Fabaceae	Liana	Introduced	Tropical Asia	Wild (Naturalized)	Not Evaluated	Stem with leaves, open fruits with seeds		x
421	Tamarinhos. Iutai. Pis p. 157. Marg p. 107	Tamarindus indica L.	Fabaceae	Tree	Introduced	Tropical Africa	Domesticated	Least Concern	Upper part of trunk with leaves and fruits	x	x
423	Caaeo. Erva mimosa. Iuquery. Pis p. 202. 304. Marg p. 73 (crossed: 64)	Mimosa pigra L.	Fabaceae	Shrub	Native		Wild	Least Concern	Stem with leaves, flowers and fruits	x	x
425	Caaeo 2. Marg p. 74	Mimosa polydactyla Humb. et Bonpl.	Fabaceae
425	Caaeo 3. Marg p. 74	Mimosa pigra L.	Fabaceae
427	Iuqueri-omnano. Marg p. 64 (crossed: at p. 123?)	Mimosa sensitiva L.	Fabaceae
429	Iuapita	Parkia pendula (Willd.) Walp.	Fabaceae	Tree	Native		Wild	Least Concern	Branch with leaves and fruits	x
431	Guajnatimbo. Pis p. 249	Indigofera suffruticosa Mill.	Fabaceae	Shrub	Native		Wild / Cultivated	Not Evaluated	Stem with leaves, flowers and fruits	x
433	Anonyma	Combretum fruticosum (Loefl.) Stuntz	Combretaceae	Liana	Native		Wild	Not Evaluated	Stem with leaves, flower buds and flowers
435	Ibapéba	Pouteria caimito (Ruiz & Pav.) Radlk.	Sapotaceae	Tree	Native		Wild / Cultivated	Least Concern	Fruits and open fruits, seeds
437	Murucaja guaçu & Guainumbiacajuba. Murucuja 4. Pis p. 247. Marg p. 70	Passiflora quadrangularis L.	Passifloraceae	Liana	Native		Domesticated	Not Evaluated	Stem with leaves, tendrils, flowers, fruits, open fruit with seeds	x	x
439	Murucuja 1. Pis p. 247. Marg p. 71	Passiflora cincinnata Mast	Passifloraceae
441	Murucuja 2. Pis p. 248. Marg p. 71	Passiflora cincinnata Mast	Passifloraceae
443	Murucaja 3. Pis p. 248. Marg p. 71	Passiflora edulis Sims	Passifloraceae
445	Murucaja 5ta. Murucaja-miri. P. HB. p. 107	Passiflora alata Curtis	Passifloraceae
447	Hedera Murucaja spés. Marg p. 73	Passiflora foetida L.	Passifloraceae
449	Nhandiroba. Pis p. 259. Marg. p. 46	Fevillea trilobata L.	Cucurbitaceae	Liana	Native		Wild	Not Evaluated	Stem with leaves, tendrils, fruits, open fruit with seeds	x		x
451	Içipoicica	Araujia sericifera Brot.	Apocynaceae	Liana	Native		Wild	Not Evaluated	Stem with leaves, fruits, open fruit with seeds, seeds
453	Ierumnate	Cucurbita pepo L.	Cucurbitaceae	Liana	Introduced	North America, Mexico	Domesticated	Least Concern	Fruit	x			x
455	Amuayembo. Ambuayembo. Pis p. 260. Marg p. 15	Aristolochia labiata Willd.	Aristolochiaceae	Liana	Native		Wild	Least Concern	Stem with leaves and flower	x
457	Umbati (m crossed)	Matelea ganglinosa (Vell.) Rapini	Apocynaceae	Liana	Native		Wild	Not Evaluated (Endemic to Brazil)	Stem with leaves, flowers, fruits and open fruit	x
459	Caaataja. Pis p. 230. Marg p. 31. Erva cidreira. Marg p. 32	Lindernia diffusa (L.) Wettst.	Linderniaceae	Herb	Native		Wild	Not Evaluated	Stem with leaves and roots	x	x
461	Cajatia. Pis p. 245. Caaçica. Id. p. 311. Marg p. 7. Caacica. Marg p. 15	Euphorbia hirta L.	Euphorbiaceae
463	Cajatia alia. Pis p. 245	Euphorbia hyssopifolia L.	Euphorbiaceae
465	Tupeiçava seu Scoparia. Pis p. 246. Basourinha. Pis HB. p. 110	Scoparia dulcis L.	Plantaginaceae
467	Caaponga. 1. Pis p. 243. M. 49	Blutaparon vermiculare (L.) Mears	Amaranthaceae
469	Caaponga. 2. Pis p. 243. Perexil Lus Marg p. 14	Sesuvium portulacastrum (L.) L.	Aizoaceae
471	Caaponga. 3. Pis p. 243	Portulaca halimoides L.	Portulacaceae
473	Caapotiragoa. Marg p. 8 & p. 9 alia	Mitracarpus hirtus (L.) DC.	Rubiaceae
475	Anonyma. Marg p. 14	Unknown
477	Mureci. Pis p. 171. Mureçipitinga. Marg p. 118	Byrsonima cydoniifolia A.Juss.	Malphigiaceae	Tree	Native		Wild / Cultivated	Not Evaluated	Branch with leaves, flower buds, flowers and fruits	x	x
479	Mureçi-guaçu. Pis p. 171. Marg p. 118	Byrsonima cydoniifolia A.Juss.	Malphigiaceae
481	Caapomonga. 1 alys Caandirop. Pis p. 200. Marg p. 28	Plumbago zeylanica L.	Plumbaginaceae	Shrub	Introduced	Tropical Asia	Wild (Naturalized)	Not Evaluated	Stem with leaves, flowers (with calyx tube), flower buds?	x			x
483	Pino. Pis p. 235. Marg p. 48 (crossed)	Cnidoscolus urens (L.) Arthur	Euphorbiaceae	Shrub	Native		Wild	Least Concern	Stem with leaves, flowers, flower buds?	x
485	Caajambi	Eclipta prostrata (L.) L.	Asteraceae	Herb	Native		Wild	Least Concern	Stem with leaves, flowers and fruits	x
487	Tangaraca. Written by pencil: Piso 2p 1a?	Boerhavia coccinea Mill.	Nyctaginaceae	Herb	Introduced	South US-northern South America	Wild (Naturalized)	Not Evaluated	Stem with leaves and flowers	x
489	Anduraobajamiri. Andira vulgo Angelim. Pis p. 175. Marg p. 100	Andira fraxinifolia Benth.	Fabaceae	Tree	Native		Wild	Least Concern (Endemic to Brazil)	Branch with leaves, fruits and flowers	x
491	Saamouna. Pis p. 175. Zamouna. Pis HB. p. 81	Ceiba erianthos (Cav.) K.Schum.	Malvaceae
493	Tremace. Pis p. 176. Tremate Marg p. 61-81	Vernonanthura brasiliana (L.) H.Rob.	Asteraceae
495	Cuipouna. Pis p. 178	Cestrum coriaceum Miers	Solanaceae
497	Iuripeba mas Pis. p. 181. Marg p. 89	Solanum paludosum Moric	Solanaceae
497	Iuripeba fem Pis. p. 181. Marg p. 89	Solanum paniculatum L.	Solanaceae
499	Ivapeba. Pis p. 182	Solanum lycocarpum A. St.-Hil.	Solanaceae
501	Iva. Marg p. 63. Iva umba. Marg p. 108	Ximenia americana L.	Olacaceae
503	Guirapariba vel Urupariba. Marg p. 118. Guirapariba. Marg p. 108	Handroanthus serratifolius (Vahl) S.O.Grose	Bignoniaceae
505	Tapirapecu. Pis p. 182	Elephantopus mollis Kunth	Asteraceae
507	Caaacanga	Stachytarpheta indica (L.) Vahl	Verbenaceae	Herb	Native		Wild	Not Evaluated	Stem with leaves and flowers
509	Anonyma	Margaritaria nobilis L.f.	Phyllanthaceae	Tree	Native		Wild	Least Concern	Branch with leaves, fruits and flowers
511	Caaapia. Pis p. 232. 311. Caaopia. Marg p. 96-52	Dorstenia brasiliensis Lam.	Moraceae	Herb	Native		Wild	Least Concern	Stem with leaves, rhizomes and flowers	x	x
513	Urucurana	Hibiscus furcellatus Desr.	Malvaceae	Shrub	Native		Wild	Least Concern	Stem with leaves and flowers
515	Perrexil do mar. Caapeba. Written by pencil: Marg 39?	Sesuvium portulacastrum (L.) L.	Aizoaceae	Herb	Native		Wild	Not Evaluated	Stem with leaves and flowers	x	x
517	Iacuacunga (?). Iacua acanga Pis p. 229. Marg. p. 6	Heliotropium indicum L.	Boraginaceae	Herb	Native		Wild	Not Evaluated	Stem with leaves and inflorescence	x
519	Iacuacanga spés. Marg p. 6	Heliotropium indicum L.	Boraginaceae
521	Betrys vel Betre. Pis p. 196. Marg p. 124	Piper divaricatum G.Mey.	Piperaceae
523	Betrys faemina & alia spés. Pis p. 196	Piper anisum (Spreng.) Angely	Piperaceae
525	Pitoma. Marg p. 125	Talisia esculenta (Cambess.) Radlk.	Sapindaceae
527	Nhandu. Pis p. 197. Piper caudatum. Marg p. 75	Piper marginatum Jacq.	Piperaceae
529	Aguaxima. Pis p. 197. Malva d' Isco. Pis HB. p. 104	Piper umbellatum L.	Piperaceae
531	Alcea hirsuta. fl: flavorem: moschato. Marg p. 45	Abelmoschus moschatus Medik.	Malvaceae
533
535	Cachira 1. Pis p. 198	Indigofera microcarpa Desv.	Fabaceae
537	Cachira 2. Pis p. 199	Eclipta prostrata (L.) L.	Asteraceae
539	Anonyma	Lippia cf. origanoides Kunth	Verbenaceae	Shrub	Native		Wild	Not Evaluated	Stem with leaves and flowers
541	Anonyma	Gomphrena vaga Mart.	Amaranthaceae	Herb	Native		Wild	Least Concern	Stem with leaves and flowers (Rhuellia: flower)	x
541		Unknown	Unknown	Unknown	Unknown		Unknown	Unknown
543	Anonyma	Mandevilla scabra (Hoffmanns. ex Roem. & Schult.) K.Schum.	Apocynaceae	Liana	Native		Wild	Not Evaluated	Stem with leaves, flowers, flower buds
545	Anonyma	Volkameria cf. aculeata L.	Lamiaceae	Shrub	Native		Wild	Least Concern	Stem with leaves, flowers, fruit				x
547	Quamoclit (Quamoclit. Foliis tenuiter incisis et penatis J.)	Ipomoea quamoclit L.	Convolvulaceae
549
551
553	Quity. Pis p. 162. Marg p. 113	Sapindus saponaria L.	Sapindaceae
555	Camara-guaçu	Helianthus annuus L.	Asteraceae	Herb	Introduced	Mexico, North America	Domesticated	Not Evaluated	Stem with leaves, younger / older inflorescence
557	Guajabu. Pis p. 153. Marg p. 104	Psidium guajava L.	Myrtaceae
559	Guabipocaiba. Pis HB. p. 80. Guaibapocacaiba. Marg p. 111	Samanea saman (Jacq.) Merr.	Fabaceae
561	Pacóèira. Piso p. 154. Bacoba. Marg p. 137	Musa × paradisiaca L.	Musaceae
563	Bananiera. Pis p. 155. Banana. Marg p. 138	Musa × paradisiaca L.	Musaceae
565	Saiimbeiba. Marg p. 111	Curatella americana L.	Dilleniaceae
565	Visqueiro. Marg p. 116	Parkia pendula (Willd.) Walp.	Fabaceae
567	Muiva. Marg. p. 117	Miconia holosericea (L.) DC	Melastomataceae
569	micambe. Marg p. 9	Cassia grandis L.f.	Fabaceae
571	Pinoguaçu mas et fam: Pis p. 159	Carica papaya L.	Caricaceae
573	Ibirapitanga. Pis 164. Marg. 101	Paubrasilia echinata (Lam.) Gagnon, H.C.Lima & G.P.Lewis	Fabaceae
575	Gonondima. Marg p. 106	Symphonia globulifera L.f.	Clusiaceae
577	Camacari. Marg p. 102	Caraipa densifolia Mart.	Calophyllaceae
579	Mamoeria mas et fem Marg p. 102	Carica papaya L.	Caricaceae
581	Iberaputeruna. marg p. 120	Dialium guianense (Aubl.) Sandwith	Fabaceae
583	Iitò Iity (crossed). Marg p. 120	Guarea guidonia (L.) Sleumer	Meliaceae
585	Tuimanti-iba. Marg p. 136	Erythrina velutina Willd.	Fabaceae
585	Cabuciba. Marg p. 137	Myroxylon balsamum (L.) Harms	Fabaceae
587	Iacaranda 1. Pis p. 164. Marg p. 135	Swartzia pickelii Ducke	Fabaceae
589	Iacaranda 2. Pis p. 165	Jacaranda brasiliana (Lam.) Pers.	Bignoniaceae
591	Queraiba. Pis p. 165. Marg p. 135	Tabebuia aurea (Silva Manso) Benth. & Hook.f. ex S.Moore	Bignoniaceae
593	Iabotipita. Pis p. 166. Marg p. 100	Ouratea caudata Engl.	Ochnaceae
595	Cebipira-guaçu. Pis p. 169. Marg p. 100	Bowdichia virgilioides Kunth	Fabaceae
597	Cebipira-miri. Pis p. 169. Marg p. 100	Bowdichia virgilioides Kunth	Fabaceae
599	Cujete. Pis p. 173. Marg p. 123	Crescentia cujete L.	Bignoniaceae
601	Mamanga. Pis p. 183	Senna latifolia (G.Mey.) H.S. Irwin & Barneby	Fabaceae
603	Umari. Pis p. 174. Marg p. 121	Geoffroea spinosa Jacq.	Fabaceae
605	Innominata. Marg p. 9	Anthurium coriaceum G.Don f	Araceae
605	Tareoqui. Marg p. 9	Senna obtusifolia (L.) H.S.Irwin & Barneby	Fabaceae
607	Micambe. Marg p. 9	Cleome gynandra L.	Cleomaceae
609	Pajomiroba 1 Pis p. 185	Senna occidentalis (L.) Link	Fabaceae
611	Pajomiroba 2. Pis p. 185 Tareroqui	Senna obtusifolia (L.) H.S.Irwin & Barneby	Fabaceae
613	Macarandiba. Pis p. 187	Manilkara salzmannii (A.DC.) H.J.Lam	Sapotaceae
615	Petume seu Tabacum. Pis p. 206 et species cig. ibid	Nicotiana tabacum L.	Solanaceae
617	Cuambu seu Caryophyllata. Marg. p. 43	Bidens riparia Kunth	Asteraceae
617	Belingela. Pis p. 210. Marg p. 24	Solanum aethiopicum L.	Solanaceae
619	Quigombo prior seu Alcea moschata. Pis p. 210. Marg p. 31	Abelmoschus moschatus Medik.	Malvaceae
619	Altera spés. Pis p. 211	Abelmoschus esculentus (L.) Moench	Malvaceae
621	Gangila seu Sesamum Africanum. Pis p. 211	Sesamum indicum L.	Pedaliaceae
621	Caagbiyuyo. Pis p. 217. Marg p. 59	Clidemia biserrata DC.	Melastomataceae
623	Caaguacuiba. Marg p. 97	Coccoloba mollis Casar.	Polygonaceae
623	Iperoba. Marg p. 97	Tabebuia roseoalba (Ridl.) Sandwith	Bignoniaceae
625	Anonyma. Marg p. 16	Lippia sp.	Verbenaceae
625	Marrubium Americanum. Pis p. 217. Marg p. 16	Stemodia foliosa Benth.	Plantaginaceae
627	Aguape seu Nymphea. Pis p. 219. Marg p. 23	Nymphaea amazonum Mart. & Zucc.	Nymphaeaceae
627	Potinçoba. Pis p. 221. Pulgera. Pis HB. p. 101	Persicaria acuminata (Kunth) M.Gómez	Polygonaceae
629	Camaru seu Solanum vesicarium. Pis p. 223. Marg p. 12	Physalis cf. pubescens L.	Solanaceae
631	Acutiguepo-obi. Pis p. 224	Heliconia cf. acuminata A.Rich.	Heliconiaceae
633	Mangaratia set Zinziber mas et fem. Pis p. 227. Marg p. 17. 18	Zingiber officinale Roscoe.	Zingiberaceae
635	Nhambi. Pis p. 228. 310. Marg p. 49	Eryngium foetidum L.	Apiaceae
635	Herba lanuginosa. Pis p. 230	Unknown	Unknown
637	Ipecacuanha. Pis p. 231. Marg p. 17	Carapichea ipecacuanha (Brot.) L.Andersson	Rubiaceae
639	Conambaja seu Filix. Pis p. 233. Filix. Brasil. Marg 2 p (?)	Adiantum pulverulentum L.	Pteridaceae
641	Filix an Polypodium. Marg p. 2. Coaticaa. Caticaa. Polypod. Pis. p. 233	Serpocaulon triseriale (Sw.) A.R. Sm.	Polypodiaceae
643	Ononidis. spés. Pis p. 234	Stylosanthes guianensis (Aubl.) Sw.	Fabaceae
645	Conambimiri. Pis p. 234	Adiantum latifolium Lam.	Pteridaceae
647	Avenqua seu Avenua maj & min. Marg p. 23	Pityrogramma calomelanos (L.) Link	Pteridaceae
649	Ciporema. Pis p. 236	Gallesia integrifolia (Spreng.) Harms	Phytolaccaceae
649	Tipi. pis p. 236	Petiveria alliacea L.	Phytolaccaceae
651	Ibiraremo. Pis p. 236	Gallesia integrifolia (Spreng.) Harms	Phytolaccaceae
653	Tajaoba 1 Pis p. 236. Marg p. 35	Colocasia esculenta (L.) Schott	Araceae
653	Tajaoba 2 Pis p. 237. Marg p. 36	Xanthosoma sagittifolium (L.) Schott	Araceae
655	Tajaoba 3 Pis p. 236. Marg p. 35	Caladium bicolor (Ait) Vent.	Araceae
655	Tajaoba 4 Pis p. 237. Marg p. 36	Xanthosoma sagittifolium (L.) Schott	Araceae
657	Erva di S. Maria. Pis p. 240. Marg p. 27	Asterostigma riedelianum (Schott) Kuntze	Araceae
659	Capicatinga alyis Jacarecatinga. Pis p. 241	Scleria gaertneri Raddi	Cyperaceae
659	Cararu. Pis p. 241. Marg p. 13	Amaranthus viridis L.	Amaranthaceae
661	Uva Crispa Americana. Pis p. 242	Solanum agrarium Sendtn	Solanaceae
661	Melissa agrestis. Pis. Ibid	Lippia alba (Mill.) N.E.Br. ex Britton & P.Wilson	Verbenaceae
663	Herba lanugunosa Dietamni amula Pis p. 244	Gnaphalium cf. polycaulon Pers.	Asteraceae
663	Acetosa Brasil. Marg p. 23	Talinum fruticosum (L.) Juss.	Talinaceae
665	Ibiraeem seu Liquiritia sylv.	Periandra mediterranea (Vell.) Taub.	Fabaceae
667	Ibira-obi. Marg p. 141	Libidibia ferrea (Mart. ex Tul.) L.P.Queiroz	Fabaceae
667	Ibaçamuçi. Marg p. 141	Campomanesia phaea (O.Berg) Landrum	Myrtaceae
669	Timbo-guaçu. Pis p. 249	Serjania cf. lethalis A. St.-Hil.	Sapindaceae
671	Guajanatimbo. Pis p. 249. Written by pencil: p.p. 431 (?)	Tanaecium pyramidatum (Rich.) L.G.Lohmann	Bignoniaceae
673	Cururuape. Pis p. 250. Marg p. 22 (written by pencil: cf 283)	Paullinia pinnata L.	Sapindaceae
673	Curuiri. Marg p. 109	Eugenia luschnathiana (O.Berg) Klotzsch ex B.D.Jacks	Myrtaceae
675	Tety-pote-iba. Pis p. 250	Passovia pyrifolia (Kunth) Tiegh.	Loranthaceae
677	Cumandatia. Pis p. 251	Lablab purpureus (L.) Sweet	Fabaceae
679	Cumanda-guaçu. Pis p. 251	Canavalia ensiformis C.C	Fabaceae
679	Cumandaguiri. Pis p. 252	Cajanus cajan (L.) Millsp.	Fabaceae
681	Cumandamiri. Pis p. 252	Phaseolus vulgaris L.	Fabaceae
683	Guandu. Pis p. 252	Phaseolus lunatus L.	Fabaceae
683	Guarumbee. Ibid	Phaseolus vulgaris L.	Fabaceae
687	Cara. Pis p. 255. Marg p. 29	Dioscorea alata L.	Dioscoreaceae
687	Tamoatarana. Pis p. 255. Marg p. 53	Myrosma cannifolia L.f.	Marantaceae
689	Mundubi. Pis p. 256. Marg p. 37	Arachis hypogaea L.	Fabaceae
691	Mandobi. Pis p. 256. Mundubi d' Angola. Marg p. 43	Vigna subterranea (L.) Verdc.	Fabaceae
693	Iupicanga vulgo. Radix China. Pis p. 257	Smilax rufescens Griseb.	Smilacaceae
695	Ivapecango vulgo Sarsaparrila. Pis p. 258. M. 9	Smilax cf. schomburgkiana Kunth	Smilacaceae
697	Icipo. Marg p. 14	Tetracera cf. breyniana Schlechtendal	Dilleniaceae
697	Ibati. Marg p. 19	Matelea ganglinosa (Vell.) Rapini.	Apocynaceae
699	Anonyma. 2. Marg p. 19	Aniseia cernua Moric	Convolvulaceae
701	Convolvulus marinus. Pis p. 258 çarça	Ipomoea pes-caprae (L.) R. Br.	Convolvulaceae
703	Acariçoba. Pis p. 260	Hydrocotyle bonariensis Comm. ex Lam.	Araliaceae
705	Caapeba. Pis. p. 261. 312. Marg p. 25	Cissampelos glaberrima St. Hil	Menispermaceae
705	Caaetimay. Marg p. 26	Erigeron bonariensis L.	Asteraceae
707	Hydropiper seu Erva pulgera. Marg p. 25	Persicaria punctata (Elliott) Small	Polygonaceae
709	Curua vel Curuba. Pis p. 262. Marg p. 21	Sicana odorifera (Vell.) Naudin	Cucurbitaceae
711	Embuajembo. Marg p. 26	Elaphoglossum latifolium (Sw.) J. Sm.	Dryopteriaceae
711	Tajojoa. Marg p. 26	Cayaponia tayuya (Mart.) Cogn	Cucurbitaceae
713	Iaee seu Anguria. Pis p. 263. Ibaguaçu. Marg p. 22	Citrullus lanatus (Thunb.) Matsum. & Nakai	Cucurbitaceae
715	Iurumu. Pis p. 264. Marg p. 44	Cucurbita pepo L.	Cucurbitaceae
715	Cucumis sylv. Bras. Marg p. 44	Cucumis anguria L.	Cucurbitaceae
717	Guarerua-oba seu Cucumis asininus. Pis p. 264	Ecballium elaterium (L.) A.Rich.	Cucurbitaceae
719	Arbuscula coralloides. Pis p. 265	Plexaura sp. / Plexaurella sp.	Plexauridae
719	Arbuscula spongosa. Ibib	Clathria cf. nicoleae	Microcionidae
721	Sargaço. Pis p. 266	Sargassum vulgare C.Agardh	Sargassaceae
723	Ahoay duplex. Pis p. 308	Cascabela thevetia (L.) Lippold	Apocynaceae
725	Limonia malus Americana antidotalis. Pis p. 314	Citrus × aurantiifolia (Christm.) Swingle	Rutaceae
727
729
731
733	Index Plantarum Brasiliae
734	Index Plantarum Brasiliae
735	Index Plantarum Brasiliae

## Sheet: Miscellanea Cleyeri
Dataset 1. Taxonomical identifications of the plant illustrations in the Miscellanea Cleyeri. We provided information on growth form, geographical origin, conservation and domestication status and plant parts represented. Overlaps in species composition with Marcgrave and Piso' books (1648, 1658); Marcgrave herbarium, Theatrum and LP are presented
Folio numbers Miscellanea Cleyeri (r: recto; v: verso)	Vernacular names	ID Species	Family	Life form	Native / Introduced	Exotic origin	Domestication status	Conservation status (Endemism)	Plant parts represented	Taxa present in HNB / IURNM	Taxa present in Herbarium	Taxa present in Theatrum	Taxa present in LP
12r		Cocos nucifera L.	Arecaceae	Tree	Introduced	Tropical Asia-Pacific	Domesticated	Not Evaluated	Inflorescence	x	x	x	x
12v		Ipomoea pes-caprae (L.) R. Br.	Convolvulaceae	Liana	Native		Wild	Not Evaluated	Stem, leaves	x
13r		Gustavia augusta L.	Lecythidaceae	Shrub	Native		Wild	Not Evaluated	Flowers	x		x
13r		Gossypium cf. barbadense L.	Malvaceae	Shrub	Introduced	Andes (Peru)	Domesticated	Least Concern	Stem, leaves, flowers	x		x
13v		Gustavia augusta L.	Lecythidaceae	Shrub	Native		Wild	Not Evaluated	Stem, leaves, flowers
14r		Ricinus communis L.	Euphorbiaceae	Shrub	Introduced	Tropical Africa	Wild / Cultivated	Not Evaluated	Leaves	x		x
14v	Ligt groen	Zanthoxylum sp.	Rutaceae	Tree	Native		Wild	Not Evaluated	Trunk, leaves, flowers / fruits
29r		Ipomoea quamoclit L.	Convolvulaceae	Liana	Introduced	Central America	Wild	Not Evaluated	Stem, leaves, flowers
49r		Eugenia cf. brasiliensis Lam.	Myrtaceae	Tree	Native		Wild	Least Concern (Endemic to Brazil)	Stem, leaves, fruits			x
51r	Mangabiba p. 122 / Orange? / P…	Annona cf. glabra	Annonaceae	Tree	Native		Wild	Least Concern	Fruit	x		x
51r		Psidium guajava L. (The big one)	Myrtaceae	Tree	Introduced: https://www.cabi.org/isc/datasheet/45141	Central America	Wild / Cultivated	Least Concern	Fruit	x			x
51r		Hancornia speciosa Gomes	Apocynaceae	Tree	Native		Wild / Cultivated	Not Evaluated	Fruit	x		x	x
51r		Psidium guineense Sw.	Myrtaceae	Tree	Native		Wild / Cultivated	Least Concern	Fruit	x		x
52r	Inimboi	Guilandina bonduc L.	Leguminosae	Shrub	Introduced	Tropical Africa	Wild (Naturalized)	Least Concern	Stem, leaves, flowers	x	x	x
53r	Inambuguacuquiya	Erythroxylum sp.	Erythroxylaceae	Shrub	Native		Wild	Not Evaluated	Stem, leaves, fruits			x
54r	Cutiy	Canna indica L.	Cannaceae	Herb	Native		Wild / Cultivated	Not Evaluated	Trunk, leaves, flowers, fruits	x		x
55r		Capsicum baccatum L.	Solanaceae	Shrub	Native		Domesticated	Not Evaluated	Stem, leaves, fruits	x		x
55r		Citrus x aurantiifolia (Christm.) Swingle	Rutaceae	Tree	Introduced	Tropical Asia	Domesticated	Not Evaluated	Fruit	x			x
56r		Platonia insignis Mart.	Clusiaceae	Tree	Native		Wild / Cultivated	Least Concern	Stem, leaves, fruits	x
57r		Solanum cf. paniculatum L.	Solanaceae	Shrub	Native		Wild	Least Concern	Stem, leaves, fruits	x	x	x
58r	Nhandiroba	Fevillea trilobata L.	Cucurbitaceae	Liana	Native		Wild	Not Evaluated	Stem, leaves, fruits	x		x
63r		Furcraea foetida (L.) Haw.	Asparagaceae	Herb	Introduced	Central America	Wild / Cultivated	Not Evaluated	Spindle, flowers
63v	Vaalagtig groen	Citrullus lanatus (Thunb.) Matsum. & Nakai	Cucurbitaceae	Liana	Introduced	Tropical Africa	Domesticated	Not Evaluated	Stem, leaves, fruits	x	x
64r		Citrullus lanatus (Thunb.) Matsum. & Nakai	Cucurbitaceae	Liana	Introduced	Tropical Africa	Domesticated	Not Evaluated	Stem, leaves
64v	ple… groen	Furcraea foetida (L.) Haw.	Asparagaceae	Herb	Introduced	Central America	Wild / Cultivated	Not Evaluated	Stipe, flowers
65r		Citrullus lanatus (Thunb.) Matsum. & Nakai	Cucurbitaceae	Liana	Introduced	Tropical Africa	Domesticated	Not Evaluated	Fruit
66r		Lagenaria siceraria (Molina) Standl.	Cucurbitaceae	Liana	Introduced	Tropical Africa	Domesticated	Not Evaluated	Fruit	x
66v	…P. 180	Ricinus communis L.	Euphorbiaceae		Introduced	Tropical Africa	Wild / Cultivated		Stem, leaves, fruits
66v		Lagenaria siceraria (Molina) Standl.	Cucurbitaceae	Liana	Introduced	Tropical Africa	Domesticated	Not Evaluated	Fruit
67r	Pindova Lusitan. Inaja Brasil Pison. Pindova p. 125 (vaal groen)	Attalea compta Mart.	Arecaceae	Tree	Native		Wild	Not Evaluated (Endemic to Brazil)	Trunk, leaves, fruits	x
67v		Citrullus lanatus (Thunb.) Matsum. & Nakai	Cucurbitaceae	Liana	Introduced	Tropical Africa	Domesticated	Not Evaluated			x
68r	Hiuca	Furcraea foetida (L.) Haw.	Asparagaceae	Herb	Introduced	Central America	Wild / Cultivated	Not Evaluated	Spindle, leaves
69r	…flor hiuca….	Abelmoschus moschatus Medik.	Malvaceae	Shrub	Introduced	Tropical Africa	Wild / Cultivated	Not Evaluated	Stem, flower, fruits	x	x
70r	Mandihoca species	Manihot esculenta Crantz.	Euphorbiaceae	Shrub	Native		Domesticated	Not Evaluated	Stem, leaves, tubers	x	x

## Sheet: Libri Principis
Dataset 1. Taxonomical identifications of the plant illustrations in the Libri Principis. We provided information on growth form, geographical origin, conservation and domestication status and plant parts represented. Overlaps in species composition with Marcgrave and Piso' books (1648, 1658); Marcgrave herbarium, Theatrum and MC are presented
Folio numbers Libri Principis	Vernacular names	ID Species	Family	Life form	Native / Introduced	Exotic Origin	Domestication status	Conservation status (Endemism)	Plant parts represented	Taxa present in HNB / IURNM	Taxa present in Herbarium	Taxa present in Theatrum	Taxa present in MC
2		Centrosema brasilianum (L.) Benth.	Leguminosae	Liana	Native		Wild	Not Evaluated	Stem, leaves, flowers, tendrils		x
3	Clitoria
4		Plumbago zeylanica L.	Plumbaginaceae	Herb	Introduced	Tropical Asia	Wild (Naturalized)	Not Evaluated	Stem, leaves, flowers (plus details of flower calyx)	x		x
6		Passiflora cf. foetida L.	Passifloraceae	Liana	Native		Wild	Not Evaluated	Stem, leaves, flowers, tendrils	x
7	Passiflora
8		Physalis cf. pubescens L.	Solanaceae	Herb	Native		Wild	Least Concern	Stem, leaves, flowers, fruits (plus detail of fruit open)	x	x	x
9	Solanum
10		Monstera adansonii Schott	Araceae	Liana	Native		Wild	Not Evaluated	Stem, leaf, flower
11	Passiflora
14		Passiflora cf. alata Curtis	Passifloraceae	Liana	Native		Wild	Not Evaluated	Flower	x	x
15	Passiflora
16		Passiflora cincinnata Mast.	Passifloraceae	Liana	Native		Wild	Not Evaluated	Stem, leaves, flowers, tendrils	x
17	Passiflora
18		Argemone mexicana L.	Papaveraceae	Herb	Introduced	Central America	Wild (Naturalized)	Not Evaluated	Stem, leaves, flowers, fruits (closed)
20		Commelina erecta L.	Commelinaceae	Herb	Native		Wild	Least Concern	Stem, leaves, flowers	x
20		Senna obtusifolia (L.) H.S.Irwin & Barneby	Leguminosae	Shrub	Native		Wild	Least Concern	Stem, leaves, flowers	x
22		Volkameria cf. aculeata L.	Lamiaceae	Shrub	Native		Wild	Least Concern	Stem, leaves, flowers			x
24		Commelina sp.	Commelinaceae	Herb	Native		Wild		Stem, leaves, flowers
24		Phaseolus sp.	Leguminosae	Liana	Introduced		Unknown		Stem, leaves, flowers
26		Tagetes cf. erecta L.	Compositae	Herb	Introduced	Central America	Wild (Naturalized) / Cultivated	Not Evaluated	Flower
28		Turnera subulata L.	Passifloraceae	Shrub	Native		Wild	Not Evaluated	Stem, leaves, flowers
29	Turnera
30		Cucurbita pepo L.	Cucurbitaceae	Liana	Introduced	North America, Mexico	Domesticated	Least Concern	Stem, leaf, tendrils, flower, fruit (open)	x		x
32		Phaseolus vulgaris L.	Leguminosae	Liana	Introduced	Central America, Andes	Domesticated	Least Concern	Stem, leaves, flowers, fruits			x
34		Passiflora cf. foetida L.	Passifloraceae	Liana	Native		Wild	Not Evaluated	Stem, leaves, flowers, tendrils
35	Passiflora
36		Ruellia cf. elegans Poir.	Acanthaceae	Herb	Native		Wild	Not Evaluated	Stem, leaves, flowers
36		Spermacoce cf. verticillata L.	Rubiaceae	Herb	Native		Wild	Not Evaluated	Stem, leaves, flowers
38		Cf. Plumeria sp.	Apocynaceae	Tree	Introduced	Tropical Asia	Domesticated		Flower
51	Mangaba	Hancornia speciosa Gomes	Apocynaceae	Tree	Native		Wild / Cultivated	Not Evaluated	Fruit	x		x	x
53	Nana	Ananas comosus (L.) Merr.	Bromeliaceae	Herb	Native		Domesticated	Not Evaluated	Leaves, fruit	x	x	x
55	Nana	Ananas comosus (L.) Merr.	Bromeliaceae	Herb	Native		Domesticated	Not Evaluated	Fruit (open)
57	Pinda	Melocactus violaceus subsp. margaritaceus N.P.Taylor	Cactaceae	Shrub (succulent)	Native		Wild	Vulnerable: Decreasing / Cites (Endemic to Brazil)	Mature plant (leaves and cephalium)
58	Cactus
61	Mûndûi	Arachis hypogaea L.	Leguminosae	Herb	Native		Domesticated	Not Evaluated	Fruit	x
62	Arachis hypogaea
63	Múrúcujâ	Passiflora sp.	Passifloraceae	Liana	Native		Wild	Not Evaluated	Fruit
65	Timacambire	Ananas comosus var. bracteatus (Lindl.) Coppens & F.Leal	Bromeliaceae	Herb	Native		Wild	Not Evaluated (Endemic to Brazil)	Stem, leaves, flowers
66	Bromelia
67		Ipomoea batatas (L.) Lam.	Convolvulaceae	Liana	Introduced	Central America, Peru	Domesticated	Data Deficient	Tubers	x	x	x
67	Cara	Dioscorea cf. alata L.	Dioscoreaceae	Liana	Introduced	Tropical Asia	Domesticated	Not Evaluated	Tubers	x
68	Dioscorea
69	Pacoba (crossed) Banana	Musa × paradisiaca L.	Musaceae	Herb	Introduced	Tropical Asia-Pacific	Domesticated	Not Evaluated	Fruit
70	Musa
71	Mamaon	Carica papaya L.	Caricaceae	Tree	Introduced	Central America, Caribbean	Domesticated	Not Evaluated	Leaves, fruit	x	x
72	Carica papaya
73	Jerúmû	Cucurbita pepo L.	Cucurbitaceae	Liana	Introduced	North America, Mexico	Domesticated	Least Concern	Fruit
75	Gúaiâba	Psidium guajava L.	Myrtaceae	Tree	Introduced	Central America	Wild (Naturalized) / Cultivated	Least Concern	Fruit	x			x
76	Psidium ….
77	Najâgúaçû	Cocos nucifera L.	Arecaceae	Tree	Introduced	Tropical Asia-Pacific	Domesticated	Not Evaluated	Leaves, fruit	x	x	x	x
78	Cocos nucifera
79	Limes (crossed) Oranges	Citrus x aurantium L.	Rutaceae	Tree	Introduced	Tropical Asia	Domesticated	Not Evaluated	Leaves, fruit
80	Citrus
81	Bacoba	Musa × paradisiaca L.	Musaceae	Herb	Introduced	Tropical Asia-Pacific	Domesticated	Not Evaluated	Leaf, fruit	x
82	Musa
83	Limes	Citrus x aurantiifolia (Christm.) Swingle	Rutaceae	Tree	Introduced	Tropical Asia	Domesticated	Not Evaluated	Stem, leaves, fruit	x			x
