# Supplementary material for: Looking into the flora of Dutch Brazil: botanical identifications of seventeenth century plant illustrations in the Libri Picturati
Source: Research Square preprint supplement (doi:10.21203/rs.3.rs-609648/v1), 2021-06-14
Supplement: Supplementary file 1 [file 0250bb2e301a88b82e9fc939.pdf]

**Supplementary Table S1** Content and plant taxa identified in the *Libri Picturati*'s Brazilian plant collection.

---

***Theatrum Rerum Naturalium***

---

735 folios numbered (1-735), verso always blank

1-731 folios with illustrations, vernacular names, references and blank folios

733-735 folios with Index *Plantarum Brasiliae*

366 folios (recto) plus one glued folio between 729 and 731

15 folios completely blank

One folio with only a vernacular name (Ambaibuna) (Fig. 1)

190 folios without illustrations but with 220 vernacular names and references

30 folios with two vernacular names (from two taxa) per folio

205 taxa with 18 vernacular names that occur twice

198 taxa identified to species level, four to genus level and three unidentified

160 folios with Brazilian plant illustrations

172 Brazilian plant illustrations that correspond to 176 plant images

12 folios with two figures per folio, one folio with three taxa (f. 37), two folios with two taxa (f. 341, 541)

11 taxa depicted twice and one taxon depicted three times

163 taxa identified: 150 identified to species level, eight to genus level, five unidentified

---

***Libri Principis***

---

34 folios with plant illustrations that correspond to 38 plant images

Four folios with two taxa per folio

35 plant names: 17 Latin names (13 unique) and 18 vernacular names (16 unique)

32 plant images identified to species level and six plants identified to genus level

Four species depicted twice

---

---

34 taxa identified: 29 taxa identified to species level and five taxa identified to genus level

---

***Miscellanea Cleyeri***

---

28 folios with plant illustrations that correspond to 34 plant images

One folio with two figures per folio (f. 55), four folios with one taxon

Two folios with two taxa depicted, one folio with three taxa depicted (f. 57)

35 plant names: 17 Latin names (13 unique), 18 vernacular names (16 unique)

32 plants identified to species level and two plants identified to genus level

Three species depicted twice, one species depicted three times, one species depicted four times

26 taxa identified: 24 identified to species level and two taxa identified to genus level

---
