# Supplementary material for: Looking into the flora of Dutch Brazil: botanical identifications of seventeenth century plant illustrations in the Libri Picturati
Source: Research Square preprint supplement (doi:10.21203/rs.3.rs-609648/v1), 2021-06-14
Supplement: Supplementary file 2 [file 0d4cb745bf76ceda09a4a846.pdf]

**Supplementary Table S3** Conservation status of plant species from the *Libri Picturati*

currently categorized as threatened by anthropogenic disturbance.

|                                    | <i>Conservation<br/>status</i>                                 | <i>Endemic Region</i>               | <i>Threats<sup>a</sup></i>                                        |
|------------------------------------|----------------------------------------------------------------|-------------------------------------|-------------------------------------------------------------------|
| <i>Aechmea muricata</i>            | Endangered                                                     | Atlantic<br>Rainforest              | Urbanization                                                      |
| <i>Hippeastrum psittacinum</i>     | Endangered                                                     | Atlantic<br>Rainforest              | Mining, harvesting<br>(ornamental, medicinal)                     |
| <i>Pilocarpus jaborandi</i>        | Endangered                                                     | Atlantic<br>Rainforest,<br>Caatinga | Fragmented population,<br>deforestation, harvesting<br>(medicine) |
| <i>Swartzia pickelii</i>           | Endangered/ Near<br>Threatened / Least<br>Concern <sup>b</sup> | Atlantic<br>Rainforest,<br>Caatinga | Wood and fruit harvesting                                         |
| <i>Melocactus violaceus</i>        | Vulnerable:                                                    | Atlantic                            | Urbanization, road                                                |
| <i>subsp. margaritaceus</i>        | Decreasing /<br>CITES-listed                                   | Rainforest                          | construction, agro-industry                                       |
| <i>Bowdichia virgilioides</i>      | Near Threatened                                                |                                     | Logging, ornamental trade                                         |
| <i>Avicennia schaueriana</i>       | Least Concern:<br>Decreasing                                   |                                     | Urbanization, pollution,<br>agri- /aquaculture, logging           |
| <i>Brasiliopuntia brasiliensis</i> | Least Concern:<br>Decreasing /<br>CITES-listed                 |                                     | Urbanization, agriculture,<br>mining, logging                     |

*Laguncularia racemosa* Least Concern:

Decreasing

Urbanization, industries,

agriculture, aquaculture,

logging, pollution

---

<sup>a</sup> Threats retrieved from <http://cncflora.jbrj.gov.br/> and <https://www.iucnredlist.org/>.

<sup>b</sup> *Swartzia pickelii* is considered Least Concern by the CNC-Flora, but Endangered by the Fundação Biodiversitas (2005) and Near Threatened by the MMA (Ministério do Meio Ambiente, 2008)
