# Supplementary material for: Looking into the flora of Dutch Brazil: botanical identifications of seventeenth century plant illustrations in the Libri Picturati
Source: Research Square preprint supplement (doi:10.21203/rs.3.rs-609648/v1), 2021-06-14
Supplement: Supplementary file 3 [file 68b2b74f9c6e8e69f12de01f.xlsx]

## Sheet: Sheet1
Dataset 2. Taxa at species level present in the HNB (Marcgrave and Piso, 1648) and IURNM (Piso 1658), as well as in Marcgrave's herbarium (collected during 1638-1643/4). Identifications were based in Pickel (2008) and its revision by Alcantara et al. (2019). We also consulted Andrade-Lima et al. (1977) for the herbarium identifications
Species HNB (1648) / IURNM (1658)	Page number (M. Marcgrave 1648; P1. Piso 1648; P2. Piso 1658)	Herbarium (1638-1643/4)	Folio number
Abarema cochliocarpos (Gomes) Barneby & J.W.Grimes	P1. 77; P2. 168	Abelmoschus moschatus Medik.	31
Abelmoschus esculentus (L.) Moench	M. 31; P2. 211	Abrus precatorius L.	57
Abelmoschus moschatus Medik.	M. 45; P2. 210	Acacia chrysantha (Vahl) DC.	95, 96
Adiantum latifolium Lam.	M. 23; P2. 234	Adianthum pulverulentum L.	21
Adiantum pulverulentum L.	M. 2; P2. 233	Alternanthera brasiliana (L.) Kuntze	145
Aechmea aquilega (Salisb.) Griseb.	M. 87; P2. 193	Amaranthus viridis L.	33
Aechmea tomentosa Mez	M. 86	Anacardium occidentale L.	87
Ageratum conyzoides (L.) L.	M. 25; P2. 218	Ananas comosus (L.) Merr.	6
Aloe vera (L.) Burm.f.	M. 37; P2. 193	Andropogon bicornis L.	105
Amaranthus viridis L.	M. 13; P2. 241	Annona montana Macfad.	47, 78
Anacardium occidentale L.	M. 94; P1. 57; P2; 120	Ayenia magna L.	132
Ananas comosus (L.) Merr.	M. 33; P1. 87; P2. 194	Blechnum serrulatum Rich.	73
Andira fraxinifolia Benth	M. 100; P1. 81; P2. 175	Blutaparon vermiculare (L.) Mears	17
Andropogon bicornis L.	M. 2; P2. 238	Byrsonima sericea DC.	35
Aniba canellila (Kunth) Mez	P1. 98; P2. 146	Byrsonima cydoniifolia A.Juss.	82
Aniseia cernua Moric	M. 19	Caesalpinia coriaria (Jacq.) Willd.	49
Annona glabra L.	M. 94; P1. 48, 70; P2. 142	Calopogonium caeruleum (Benth.) Sauvalle	85, 86
Annona montana Macfad.	M. 93, 94; P1. 69, 70; P2. 141, 142	Campomanesia dichotoma (O.Berg) Mattos	67, 68
Anthurium coriaceum (Graham) G.Don	M. 9	Capraria biflora L.	72
Apeiba tibourbou Aubl.	M. 123	Carapichea ipecacuanha (Brot.) L.Andersson	39
Aquarius floribundus (Seub.) Christenh. & Byng	M. 49	Cardiospermum corindum L.	64, 65, 142, 147
Arachis hypogaea L.	M. 37; P2. 256	Carica papaya L.	44, 93
Aristolochia labiata Willd.	M. 15; P2. 260	Casearia sylvestris Sw.	52
Arundo donax L.	P1. 109; P2. 214	Cecropia pachystachya Trécul	115
Aspidosperma nigricans Handro	P2. 141	Centrosema brasilianum (L.) Benth.	131, 154
Asterostigma riedelianum (Schott) Kuntze	M. 27; P2. 239	Chamaecrista repens var. multijuga (Benth.) H.S.Irwin & Barneby	77
Astrocaryum aculeatissimum (Schott) Burret	P2. 129	Chamaecrista diphylla (L.) Greene	97
Astrocaryum vulgare Mart.	P1. 62; P2. 128	Chamaecrista flexuosa (L.) Greene	117, 118
Attalea compta Mart.	M. 133; P1. 62; P2. 125	Chrysobalanus icaco L.	10, 11
Avicennia schaueriana Stapf & Leechm. ex Moldenke	M. 127; P1. 113; P2. 204	Cissampelos glaberrima St. Hil	81
Bactris maraja Mart.	P2. 129	Citrullus lanatus (Thunb.) Matsum. & Nakai	54
Bidens riparia Kunth	M. 45; P2. 208	Clidemia biserrata DC.	25, 46
Bixa orellana L.	M. 61; P1. 65; P2. 133	Clusia nemorosa G.Mey.	32, 48
Blainvillea acmella (L.) Philipson	M. 44	Cocos nucifera L.	5
Blutaparon vermiculare (L.) Mears	M. 14; P2. 243	Colocasia esculenta (L.) Schott	23
Boerhavia coccinea Mill.	M. 28, 60; P1. 92, 109; P2. 200	Conocarpus erectus L.	28, 30
Bowdichia virgilioides Kunth	M. 100; P1. 78; P2. 168	Corchorus hirsutus L.	141
Brasiliopuntia brasiliensis (Willd.) A.Berger	M. 125; P1. 100; P2. 189, 190	Cordia cf. toqueve Aubl.	41
Bromelia karatas L.	M. 33, 88; P1. 111; P2. 191, 196	Crescentia cujete L.	50
Brunfelsia uniflora (Pohl) D.Don	M. 69; P1. 85; P2. 184	Crotalaria incana L.	139
Byrsonima sericea DC. (M: 134)	M. 134	Crotalaria stipularia Desv.	36
Byrsonima cydoniifolia A.Juss.	M. 118; P1. 79; P2. 171	Croton cf. refractus Muell. Arg.	128
Cajanus cajan (L.) Millsp.	M. 62; P2. 251	Croton campestris A.St.-Hil.	144
Caladium bicolor (Ait) Vent.	M. 36; P1. 95; P2. 237	Croton grewioides Baill.	149
Calea elongata Baker	M. 6; P2. 177	Cynodon dactylon (L.) Pers.	112
Campomanesia dichotoma (O.Berg) Mattos	M. 117; P1. 73; P2. 149	Cyperus luzulae (L.) Retz.	106
Campomanesia phaea (O.Berg) Landrum	M. 141	Desmodium incanum DC.	93
Canavalia ensiformis C.C	P2. 251	Desmoncus polyacanthos Mart.	98, 156
Canna glauca L.	M. 5; P1. 117; P2. 213	Dichotomaria obtusata (J.Ellis & Solander) Lamarck	113
Canna indica L.	M. 4; P1. 116; P2. 212	Diodia rosmarinifolia Pohl.	133, 134
Capsicum baccatum L.	M. 39; P1. 108; P2. 225	Dorstenia brasiliensis Lam.	29
Capsicum frutescens L.	M. 39; P1. 107; P2. 225	Elytraria imbricata (Vahl) Pers.	152, 170
Capsicum annuum L.	M. 39	Eragrostis japonica (Thunb.) Trin.	109
Caraipa densifolia Mart.	M. 102	Erigeron bonariensis L.	125, 168
Carapichea ipecacuanha (Brot.) L.Andersson	M. 17; P1. 102; P2. 231	Eschweilera ovata (Cambess.) Mart. ex Miers	94
Carica papaya L.	M. 102; P2. 159	Eugenia uniflora L.	70
Cariniana legalis (Mart.) Kuntze	M. 127	Eugenia cf. neoformosa Sobral	119
Cascabela thevetia (L.) Lippold	M. 271; P1. 49; P2. 308	Euphorbia cotinifolia L.	103
Casearia sylvestris Sw.	M.81	Euphorbia hyssopifolia L.	74
Cassia grandis L.f.	M. 134; P2. 157	Euploca fruticosa (L.) J.I.M.Melo & Semir	138
Catasetum macrocarpum Rich. ex Kunth	M. 35; P1. 117; P2. 235	Galphimia brasiliensis (L.) Adr.Juss.	20, 22
Cayaponia tayuya (Vell.) Cogn.	M. 27	Guarea guidonia (L.) Sleumer	140
Cecropia hololeuca Miq	M. 92	Guazuma ulmifolia Lam.	37, 38
Cecropia pachystachya Trécul	M. 91; P2. 147	Guettarda platypoda DC.	51
Cedrela fissilis Vell.	P1. 98; P2. 145	Guilandina bonduc L.	7, 153
Ceiba erianthos (Cav.) K.Schum.	P1. 81; P2. 175	Gynerium sagittatum (Aubl.) B	116
Centratherum punctatum Cass.	M. 49	Hirtella racemosa var. hexandra (Willd. ex Schult.) Prance	127
Centropogon cornutus (L.) Druce	M. 14	Indigofera microcarpa Desv.	69
Ceratopteris pteridoides (Hook.) Hieron.	M. 37	Inga cf. ingoides (Rich.) Willd.	43
Cereus fernambucensis Lem.	M. 126; P1. 99; P2. 188, 190	Inga ingoides (Rich.) Willd.	19
Cereus jamacaru DC.	M. 126; P1. 99; P2. 189	Ipomoea batatas (L.) Lam.	151
Cestrum coriaceum Miers	P1. 83; P2. 178	Jatropha curcas L.	165
Chamaecrista nictitans (L.) Moench	M. 18	Cyperus sesquiflorus (Torr.) Mattf. & Kük.	120
Chloris orthonoton Döll	M. 1	Lablab purpureus (L.) Sweet	91
Chloroleucon dumosum (Benth.) G.P.Lewis	M. 108	Leptochloa virgata (L.) Beauv.	107, 110, 114
Chloroleucon foliolosum (Benth.) G.P.Lewis	M. 120	Lindernia diffusa (L.) Wettst.	167
Chomelia intercedens Müll.Arg.	M. 80	Ludwigia octovalvis (Jacq.) P.H.Raven	62
Chrysobalanus icaco L.	M. 77	Lygodium venustum Sw.	135
Cissampelos glaberrima A.St.-Hil.	M. 25; P1. 94; P2. 232, 312	Maclura tinctoria (L.) D.Don ex Steud.	136, 172
Cissus erosa Rich.	M. 8	Manihot esculenta Crantz.	4
Citrullus lanatus (Thunb.) Matsum. & Nakai	M. 22; P2. 263	Maxillaria subrepens (Rolfe) Schuit. & M.W.Chase	18
Citrus × aurantiifolia (Christm.) Swingle	P2. 313	Miconia holosericea (L.) DC	3
Cleome gynandra L.	M. 10	Microtea celosioides (Spreng.) Moq. ex Sennikov & Sukhor.	12
Cleome serrata Jacq.	M. 2	Microtea cf. paniculata Moq.	148
Cleome spinosa Jacq.	M. 33	Microtea maypurensis (Kunth) G.Don	88, 169
Clidemia biserrata DC.	M. 59; P2. 217	Mimosa candollei R.Grether	2
Clidemia octona (Bonpl.) L.O. Williams	P1. 116; P2. 218	Mimosa pigra L.	158
Clusia nemorosa G.Mey.	M. 131	Mimosa polydactyla Humb. et Bonpl.	8
Cnidoscolus urens (L.) Arthur	M. 79	Mimosa sensitiva L.	99
Coccoloba mollis Casar.	M. 97	Myriopus candidulus (Miers) Feuillet	14
Cocos nucifera L.	M. 138; P1. 63; P2. 130	Nerium oleander L.	79
Colocasia esculenta (L.) Schott	M. 35; P1. 95; P2. 236	Ocimum basilicum L.	75
Commelina erecta L.	M. 8	Paepalanthus triangularis (L.) Koern.	80
Conocarpus erectus L.	M. 76	Palicourea bracteocardia (DC.) Delprete & J.H.Kirkbr.DC.) Müll.Arg.	146
Copaifera officinalis L.	M. 130; P1. 56; P2. 118	Panicum trichoides Sw.	108
Copelandia cyanescens (Berk. & Broome) Singer	P1. 47; P2. 309	Passiflora alata Curtis	9
Copernicia prunifera (Mill.) H.E.Moore	M. 130; P1. 62; P2. 126	Paullinia pinnata L.	101
Costus spiralis (Jacq.) Roscoe	M. 48	Pavonia malacophylla (Link & Otto) Garcke	137
Costus arabicus L.	M. 48	Persicaria punctata (Elliott) Small	159
Couepia rufa Ducke	M. 115; P1. 66; P2. 136	Philodendron imbe Schott ex Kunth	122
Crateva tapia L.	M. 98; P1. 68; P2. 140	Physalis angulata L.	59
Crescentia cujete L.	M. 123; P2. 173	Physalis cf. pubescens L.	61
Crotalaria stipularia Desv.	M. 55	Piper marginatum Jacq	34
Cucumis anguria L.	M. 44; P2. 264	Pombalia calceolaria (L.) Paula-Souza	164
Cucumis melo L.	M. 22	Pontederia paniculata (Spreng.) Solms	26, 27
Cucurbita pepo L.	M. 44; P2. 264	Portulaca halimoides L.	104
Curatella americana L.	M. 111	Pterolepis glomerata (Rottb.) Miq.	100
Cynophalla hastata (Jacq.) J.Presl	M. 63	Rhynchospora nervosa (Vahl) Boeck.	111
Cyperus aggregatus (Willd.) Endl.	M. 1	Rhynchospora corymbosa (L.) Britton	92
Cyperus luzulae (L.) Retz.	M. 1	Ricinus communis L.	160
Cyperus pedunculatus (R.Br.) J.Kern	P1. 115; P2. 238	Rivina humilis L.	61, 155
Cyperus sesquiflorus (Torr.) Mattf. & Kük.	M. 1	Ruellia bahiensis (Nees) Morong	45
Dalbergia nigra (Vell.) Allemão ex Benth.	M. 136; P2. 164	Samanea saman (Jacq.) Merr.	89
Desmodium incanum (Sw.) DC.	M. 2; P1. 112; P2. 201	Sapindus saponaria L.	76
Desmoncus polyacanthos Mart.	M. 64	Schultesia guianensis (Aubl.) Malme	171
Dialium guianense (Aubl.) Sandwith	M. 120	Scoparia dulcis L.	66
Didymopanax morototoni (Aubl.) Decne. & Planch.	M. 132	Securidaca volubilis L.	90
Dieffenbachia seguine (Jacq.) Schott	M. 103; P2. 220	Senna latifolia (G.Mey.) H.S. Irwin & Barneby	71
Dioclea marginata Benth.	P1. 48; P2. 306	Serjania cf. lethalis A. St.-Hil.	84
Dioscorea alata L.	M. 29; P1. 39, 93; P2. 254	Sesuvium portulacastrum (L.) L.	83
Dioscorea trifoliata Kunth	M. 52	Sicana odorifera (Vell.) Naudin	56
Distimake aegyptius (L.) A.R.Simões & Staples	M. 54	Sideroxylon obtusifolium (Roem. & Schult.) T.D.Penn.	40
Dodonaea viscosa Jacq.	M. 76	Smilax cf. schomburgkiana Kunth	166
Dorstenia brasiliensis Lam.	M. 52; P1, 90; P2. 232, 311	Solanum agrarium Sendtn	42, 63
Dorstenia cayapia subsp. asaroides (Hook.) C.C.Berg	P1. 102	Solanum paniculatum L.	16
Duguetia gardneriana Mart.	M. 94; P2. 143	Sophora tomentosa L.	13
Eclipta prostrata (L.) L.	M. 58; P2. 199	Sparattanthelium cf. tupiniquinorum Mart.	161
Elaphoglossum latifolium (Sw.) J.Sm.	M. 26	Spigelia anthelmia L	55
Elephantopus mollis Kunth	P1. 112; P2. 182	Spondias mombin L.	53
Eleusine indica (L.) Gaertn.	P1. 102	Stemodia foliosa Benth.	124
Encholirium spectabile Mart. ex Schult. & Schult.f.	P1. 112; P2. 193	Symphonia globulifera L.f.	1
Epiphyllum phyllanthus (L.) Haw.	M. 78	Tamarindus indica L.	58
Erigeron bonariensis L.	M. 26	Tephrosia cinerea (L.) Pers.	121
Ertela trifolia (L.) Kuntze	M. 36; P2. 215, 312	Trema micrantha (L.) Blume.	102
Eryngium foetidum L.	M. 49; P2. 227	Tribulus cistoides L.	130
Erythrina velutina Willd.	M. 136	Turnera ulmifolia L.	60, 126
Eschweilera ovata (Cambess.) Mart. ex Miers	M. 136	Urena lobata L.	129
Eugenia involucrata DC.	M. 108; P1. 82; P2. 178	Vernonanthura brasiliana (L.) H.Rob.	15
Eugenia luschnathiana (O.Berg) Klotzsch ex B.D.Jacks	M. 109	Vismia guianensis (Aubl.) Pers.	157
Eugenia uniflora L.	M. 116, 293; P1. 121; P2. 187	Wedelia fruticosa Jacq.	162
Eugenia pyriformis Cambess.	P1. 82; P2. 178	Xanthosoma sagittifolium (L.) Schott	24
Eugenia selloi B.D.Jacks.	M. 132; P2. 161	Xyris jupicai Rich.	150
Euphorbia hirta L.	M. 7; P1. 102; P2. 245	Zollernia latifolia Benth.	18
Euphorbia hyssopifolia L.	M. 15; P2. 246
Euterpe edulis Mart.	M. 133; P2. 128
Fevillea trilobata L.	M. 46; P2. 259
Ficus gomelleira Kunth & C.D.Bouché	M. 132
Fuirena umbellata Rottb.	M. 1
Furcraea hexapetala (Jacq.) Urb.	M. 67; P1. 112; P2. 192
Gallesia integrifolia (Spreng.) Harms	P1. 115; P2. 236
Galphimia brasiliensis (L.) A.Juss.	M. 79
Garcinia macrophylla Mart.	M. 119
Genipa americana L.	M. 92; P1. 67; P2. 138
Geoffroea spinosa Jacq.	M. 121; P2. 174
Gnaphalium cf. polycaulon Pers.	M. 31; P2. 244
Goeppertia effusa Saka & Lombardi	M. 50
Gomphrena vaga Mart.	M. 46
Gossypium barbadense L.	M. 59; P2. 186
Guadua angustifolia Kunth	M. 3; P1. 98
Guarea guidonia (L.) Sleumer	M. 120; P2. 170
Guazuma ulmifolia Lam.	M. 131; P2. 163
Guettarda platypoda DC.	M. 133
Guilandina bonduc L.	M. 12; P1. 95; P2. 205
Gustavia augusta L.	M. 109; P1. 121; P2. 172
Gynerium sagittatum (Aubl.) P.Beauv.	M. 4
Hancornia speciosa Gomes	M. 121; P1. 76; P2. 155
Handroanthus serratifolius (Vahl) S.O.Grose	M. 118
Harrisia adscendens (Gürke) Britton & Rose	M. 126
Heliconia cf. acuminata A.Rich.	M. 53; P2. 224
Heliotropium indicum L.	M. 6; P1. 109; P2. 229
Heliotropium tiaridioides Cham.	M. 7; P2. 229
Heteropsis flexuosa (Kunth) G.S.Bunting	P2. 249
Hibiscus furcellatus Desr.	M. 47; P2. 222
Hibiscus sabdariffa L.	M. 13; P2. 222
Hippeastrum psittacinum (Ker Gawl.) Herb.	M. 32; P1. 117; P2. 235
Hybanthus calceolaria (L.) Oken	M. 54; P1. 101; P2. 231
Hydrocotyle bonariensis Comm. ex Lam.	M. 27; P1. 90; P2. 259
Hymenaea cf. courbaril L.	M. 101; P1. 60; P2. 122
Ibatia ganglinosa (Vell.) Morillo	M. 19
Imperata contracta Hitchc.	M. 2; P1. 96; P2. 237
Indigofera microcarpa Desv.	M. 57; P2. 198
Indigofera suffruticosa Mill.	M. 68
Inga vera Willd.	M. 111
Inga ciliata C.Presl	M. 112
Inga edulis Mart.	M. 112
Inga ingoides (Rich.) Willd.	M. 112
Ipomoea alba L.	M. 19
Ipomoea batatas (L.) Lam.	M. 16; P1. 93; P2. 254
Ipomoea pes-caprae (L.) R. Br.	M. 51; P1. 103; P2. 258
Jacaranda brasiliana (Lam.) Pers.	M. 293; P1. 70; P2. 143, 165
Jacaratia spinosa (Aubl.) A.DC.	M. 128; P2. 160
Jatropha curcas L.	M. 96; P1. 83; P2. 179
Joannesia princeps Vell.	M. 110; P1. 72; P2. 148
Lablab purpureus (L.) Sweet	M. 33, 53; P2. 251
Lagenaria siceraria (Molina) Standl.	M. 44; P2. 264
Laguncularia racemosa (L.) C.F.Gaertn.	P1. 113; P2. 204
Lantana camara L.	M. 5; P1. 86; P2. 176
Laportea aestuans (L.) Chew	M. 48; P2. 235
Lecythis pisonis Cambess	M. 128; P1. 165; P2. 134
Libidibia ferrea (Mart. ex Tul.) L.P.Queiroz	M. 131
Lindernia diffusa (L.) Wettst.	M. 31; P1. 110; P2. 230
Lippia alba (Mill.) N.E.Br. ex Britton & P.Wilson	M. 32; P2. 242
Ludwigia hyssopifolia (G.Don) Exell	M. 30
Ludwigia octovalvis (Jacq.) P.H.Raven	M. 30
Lundia virginalis DC.	P1. 119
Lygodium flexuosum (L.) Sw.	M. 2
Maclura tinctoria (L.) D.Don ex Steud.	M. 119
Macoubea guianensis Aubl	M. 293; P2. 141
Manihot esculenta Crantz	M. 65; P1. 52; P2. 114, 305
Manihot carthaginensis subsp. glaziovii (Müll.Arg.) Allem	M. 68, 293; P1. 55; P2. 117
Manilkara salzmannii (A.DC.) H.J.Lam	P1. 120; P2. 187
Mauritia flexuosa L.f.	P2. 129
Maxillaria subrepens (Rolfe) Schuit. & M.W.Chase	M. 107
Melampodium divaricatum (Rich.) DC.	M. 45
Miconia holosericea (L.) DC	M. 117
Microtea celosioides (Spreng.) Moq. ex Sennikov & Sukhor.	M. 56
Microtea maypurensis (Kunth) G.Don	M. 7
Mimosa candollei R.Grether	M. 73; P1. 118; P2. 201, 304
Mimosa pigra L.	M. 74; P2. 202
Mimosa polydactyla Humb. et Bonpl.	M. 74; P1. 118; P2. 203
Mimosa sensitiva L.	M. 64
Mirabilis jalapa L.	P2. 207
Mitracarpus hirtus (L.) DC.	M. 8
Montrichardia linifera (Arruda) Schott	M. 106; P1. 103; P2. 219
Moquilea tomentosa Benth.	M. 115; P2. 137
Moronobea coccinea Aubl.	M. 114
Mucuna urens (L.) Medik.	M. 18; P2. 307
Musa × paradisiaca L.	M. 137, 138; P1. 76; P2. 154
Myriopus candidulus (Miers) Feuillet	M. 78
Myrosma cannifolia L.f.	M. 53; P2. 245
Myroxylon balsamum (L.) Harms	P1. 57; P2. 119
Nicotiana tabacum L.	M. 274
Nymphaea amazonum Mart. & Zucc.	M. 23; P1. 91; P2. 219
Ocotea sassafras Meissn.	P1. 98; P2. 145
Operculina hamiltonii (G. Don) D.F. Austin & Staples	M. 41; P1. 93; P2. 252
Opuntia ficus-indica (L.) Mill.	P1. 100; P2. 191
Ouratea caudata Engl	M. 101; P2. 166
Ouratea fieldingiana (Gardner) Engl.	M. 61
Pachyrhizus erosus (L.) Urb.	P2. 254
Palicourea bracteocardia (DC.) Delprete & J.H.Kirkbr.	M. 60; P1. 102; P2. 302
Palicourea crocea (Sw.) Schult.	M. 60; P1. 92; P2. 301
Parkia pendula (Willd.) Benth. ex Walp.	M. 116
Paspalum virgatum L.	M. 2
Passiflora cincinnata Mast	M. 71; P2. 248
Passiflora edulis Sims	M. 71, 73; P1. 106; P2. 247, 248
Passiflora foetida L.	M. 73
Passiflora quadrangularis L.	M. 70; P1. 106; P2. 247
Passiflora suberosa L.	P1. 107; P2. 248
Passiflora alata Curtis	M. 72
Passiflora kermesina Link & Otto	M. 72
Paubrasilia echinata (Lam.) Gagnon, H.C.Lima & G.P.Lewis	M. 101; P2. 164
Paullinia pinnata L.	M. 22; P1. 114; P2. 250
Periandra mediterranea (Vell.) Taub.	P2. 245
Persicaria acuminata (Kunth) M.Gómez	P1. 101; P2. 221
Persicaria punctata (Elliott) Small	M. 25
Petiveria alliacea var. tetrandra (Ortega) Hauman	P1. 115; P2. 236
Phaseolus lunatus L.	P2. 252
Phaseolus vulgaris L.	P2. 251, 252
Philodendron imbe Schott ex Kunth	P2. 249
Phthirusa pyrifolia (Kunth) Eichler	P1. 113; P2. 250
Phyllanthus niruri L.	M. 18
Physalis cf. pubescens L.	M. 12; P2. 222
Piper divaricatum G.Mey.	M. 124; P1. 88; P2. 196
Piper marginatum Jacq	M. 75; P1. 96; P2. 197
Piper rivinoides (Kunth) Kunth ex Steud.	M. 75; P2. 197
Piper tuberculatum Jacq.	P1. 97; P2. 216
Piper umbellatum L.	P1. 104; P2. 197
Piper anisum (Spreng.) Angely	M. 69; P1. 88; P2. 196, 215
Pityrogramma calomelanos (L.) Link	M. 23; P2. 234
Plathymenia reticulata Benth.	M. 137
Platonia insignis Mart.	M. 119
Plinia cauliflora (Mart.) Kausel	M. 141
Plumbago zeylanica L.	P1. 82, 105; P2. 200
Pontederia paniculata Spreng.	M. 53
Portulaca halimoides L.	M. 49; P2. 244
Posoqueria latifolia (Rudge) Schult.	M. 77
Pouteria grandiflora (A.DC.) Baehni	M. 113; P2. 137
Pradosia kuhlmannii Toledo	M. 101; P1. 71; P2. 146
Protium heptaphyllum (Aubl.) Marchand	M. 98, 132; P1. 59; P2. 122
Psidium cattleyanum Sabine	M. 105; P1. 74; P2. 152
Psidium guajava L.	M. 147; P1. 75; P2. 153
Psidium guineense Sw.	M. 62; P1. 74; P2. 150
Psittacanthus dichrous (Mart. ex Schult. & Schult.f.) Mart.	M. 63
Renealmia alpinia (Rottb.) Maas	M. 48
Rhizophora racemosa G.Mey.	M. 118; P1. 114; P2. 204
Rhynchospora ciliata (Vahl) Kük.	M. 1
Ricinus communis L.	M. 77; P1. 91; P2. 180
Ruellia bahiensis (Nees) Morong	M. 54
Saccharum officinarum L.	M. 82; P1. 49; P2. 108
Samanea saman (Jacq.) Merr.	M. 111; P1. 80; P2. 170
Sapindus saponaria L.	M. 113; P2. 162
Sargassum vulgare C.Agardh	P2. 266
Scaevola plumieri (L.) Vahl	M. 13
Schinus terebinthifolia Raddi	M. 90; P1. 64; P2. 132
Scleria gaertneri Raddi	P2. 240
Scoparia dulcis L.	M. 52; P1. 110, 121; P2. 246
Selenicereus undatus (Haw.) D.R. Hunt	M. 23, 125; P2. 188
Senna obtusifolia (L.) H.S.Irwin & Barneby	M. 10; P1. 86; P2. 185
Senna latifolia (G.Mey.) H.S. Irwin & Barneby	P1. 84; P2. 183
Senna occidentalis (L.) Link	M. 9; P1. 86; P2. 185
Serjania cf. lethalis A. St.-Hil.	P1. 115; P2. 249
Serpocaulon triseriale (Sw.) A.R.Sm.	M. 2; P2. 233
Sesamum indicum L.	M. 21; P2. 211
Sesuvium portulacastrum (L.) L.	M. 39; P2. 243
Setaria poiretiana (Schult.) Kunth	M. 1
Setaria parviflora (Poir.) M.Kerguelen	P1. 120; P2. 239
Sicana odorifera (Vell.) Naudin	M. 21; P2. 262
Sida linifolia Juss. ex Cav.	M. 43
Sida rhombifolia L.	P1. 87, 110; P2. 177, 246
Simira rubra (Mart.) Steyerm	M. 106
Smilax cf. schomburgkiana Kunth	M. 10; P2. 257
Smilax rufescens Griseb.	P1. 99; P2. 257
Solanum agrarium Sendtn.	M. 80; P2. 242
Solanum cf. macrocarpon L.	M. 24, P2. 209
Solanum chenopodioides Lam.	M. 55; P1. 108; P2. 223
Solanum paludosum Moric	M. 89; P1. 84; P2. 181
Solanum paniculatum L.	M. 89; P1. 84; P2. 181
Solanum lycocarpum A. St.-Hil.	M. 63; P2. 184
Sophora tomentosa L.	M. 82
Sorghum arundinaceum (Desv.) Stapf	M. 2
Sparattanthelium tupiniquinorum Mart.	M. 135
Spigelia anthelmia L.	M. 34
Spondias mombin L.	M. 129; P1. 68; P2. 139
Spondias tuberosa Arruda	M. 108; P1. 77; P2. 167
Sporobolus tenuissimus (Mart. ex Schrank) Kuntze	M. 2
Stachytarpheta cayennensis (Rich.) Vahl	M. 6
Staelia aurea K.Schum.	M. 9
Stemodia foliosa Benth.	M. 16
Stylosanthes guianensis (Aubl.) Sw.	M. 3; P2. 234
Swartzia pickelii Ducke	M. 136; P2. 164
Syagrus comosa (Mart.) Becc.	P2. 129
Syagrus oleracea (Mart.) Becc.	P2. 129
Syagrus coronata (Mart.) Becc.	M. 104; P2. 127
Symphonia globulifera L.f.	M. 106
Tabebuia aurea (Silva Manso) Benth. & Hook.f. ex S.Moore	M. 135; P2. 165
Tabebuia roseoalba (Ridl.) Sandwith	M. 97
Talinum fruticosum (L.) Juss.	M. 23; P2. 244
Talisia esculenta (A.St.-Hil., A.Juss. & Cambess.) Radlk.	M. 100, 125
Tamarindus indica L.	M. 107; P2. 157
Tanaecium cyrtanthum (Mart.) Bur. et Schum	M. 25; P2. 173
Tanaecium pyramidatum (Rich.) L.G.Lohmann	P1. 115; P2. 249
Tapirira guianensis Aubl	M. 121; P1. 56
Telmatoblechnum serrulatum (Rich.) Perrie, D.J.Ohlsen & Brownsey	M. 2
Tetracera cf. breyniana Schlechtendal	M. 14
Tillandsia usneoides (L.) L.	M. 46
Trichilia hirta L.	M. 120; P1. 80; P2. 169
Triumfetta semitriloba Jacq.	M. 80
Turnera ulmifolia L.	M. 21
Vernonanthura brasiliana (L.) H.Rob.	M: 61, 81: P2. 176
Vigna subterranea (L.) Verdc.	M. 43; P1. 93; P2. 256
Vismia guianensis (Aubl.) Pers.	M. 96; P1. 60; P2. 124
Vitex rufescens A.Juss.	M. 116
Xanthosoma sagittifolium (L.) Schott	M. 35; P1. 95; P2. 237
Ximenia americana L.	M. 108; P2. 168
Xylopia frutescens Aubl.	M. 99; P1. 71; P2. 144
Xyris jupicai Rich.	M. 1; P1. 119; P2. 238
Zingiber officinale Roscoe.	M. 17; P2. 226
Zollernia ilicifolia (Brongn.) Vogel	M. 106
